# Supplementary material for: Computer vision syndrome and associated factors among urban and rural bankers in Trinidad and Tobago
Source: PeerJ. 2024 Dec 13;12:e18584. doi: 10.7717/peerj.18584 (PMC11648678; doi:10.7717/peerj.18584)
Supplement: Supplemental Information 1 — The dataset presented here has undergone meticulous data cleaning procedures to eliminate errors, inconsistencies, and outliers. This refined dataset ensures improved accuracy and reliability. [file peerj-12-18584-s001.xlsx]

## Sheet: Cleaned
What is your gender?	How old are you?	What is your ethnic background?	What area is your bank located in ?	Is your bank located in a rural or urban area ?	What is your highest education level that you have completed?	How would you describe the seating position at the work place?	What type of device do you most use while on the job ?	While doing computer work, is the top of the screen :	How many hours do you spend using a computer daily?	How long has it been since you started using computers regularly.	Do you take breaks while using the computer during the day, if so how > 6 hours do these breaks last?	Do you wear eyeglasses?	If answer to the previous question is Yes is it covered with	Do you blink frequently while using the computer?	How will you describe the source of lighting in the office?	Do you adjust the computer brightness to an appropriate intensity? Or, do you use it as is?	Do you experience glare on your display screen?	Do you use anti-glare coatings on computers? or spectacles?	Do you have any systematic diseases such as diabetes, hypertension or thyroids?	There are eye problems caused by excessive and pro> 6 hoursed computer use.	Lights from computers can affect the eye.	Adjusting the brightness and contrast of a computer is useful.	There are materials that can decrease glare from computers.	There are spectacles made to protect your eYes from the light emitted from computers.	One should always take a break in between computer use.	Computer-related eye problems canNot be resolved medically.	Computers are made in such a way as Not to cause harm to the human eye.	Eye Strain	Rating	Blurred vision	Rating	Redness of eYes	Rating	Headaches	Rating	Dry Eyes	Rating	Eye fatigue	Rating	Burning sensation of eYes	Rating	Irritation of the eYes	Rating	Watery eYes	Rating	Double vision	Rating	Did you make effort to resolve your ocular compliant?	If Yes, What measures did you take to resolve your ocular complaint?
Female	38-43	Mixed	Mayaro	Rural	Master’s degree	Appropriate	Laptop	Below eye level?	≤ 6 hours	≥ 5 Years	≤ 20 minutes	Yes	Anti reflective coating?	No	Fluorescent light	I adjust computer brightness	Yes	Yes	No	TRUE	TRUE	TRUE	TRUE	TRUE	TRUE	FALSE	FALSE	Yes	5	Yes	5	Yes	5	Yes	5	Yes	5	Yes	5	Yes	5	Yes	5	Yes	5	Yes	5	Yes	Take breaks, Use eye drops, Obtain Specacles
Female	28-33	African	Mayaro	Rural	Master’s degree	Appropriate	Laptop	At eye level?	> 6 hours	≥ 5 Years	None at all	Yes	Anti reflective coating?	Yes	Natural light	I adjust computer brightness	Yes	No	No	TRUE	TRUE	TRUE	TRUE	TRUE	TRUE	FALSE	FALSE	Yes	9	Yes	9	Yes	6	Yes	10	Yes	6	Yes	8	Yes	10	Yes	10	Yes	10	Yes	6	Yes	Visit optometrist/opthalmologist, Obtain Specacles
Female	53-58	African	Mayaro	Rural	CSEC level	Appropriate	Desktops	At eye level?	> 6 hours	< 5 Years	None at all	Yes		No	Fluorescent light	No i do Not adjust the computer's brightness	No	Yes	No	TRUE	TRUE	TRUE	TRUE	FALSE	TRUE	FALSE	FALSE	Yes	10	Yes	10	No	0	No	0	No	0	No	0	No	0	No	0	No	0	Yes	3	Yes	Obtain Specacles
Female	33-38	African	Mayaro	Rural	Bachelor’s degree	Not appropriate	Laptop	Below eye level?	> 6 hours	≥ 5 Years	None at all	Yes	Anti reflective coating?	Yes	Fluorescent light	No i do Not adjust the computer's brightness	No	No	No	TRUE	TRUE	TRUE	TRUE	TRUE	TRUE	FALSE	FALSE	Yes	6	Yes	8	No	1	Yes	5	No	3	No	1	No	1	Yes	5	No	2	Yes	5	Yes	Drink water, Visit optometrist/opthalmologist, Obtain Specacles
Male	28-33	East Indian	Rio Claro	Urban	CAPE level	Not appropriate	Desktops	Above eye level?	> 6 hours	≥ 5 Years	None at all	Yes	Anti reflective coating?	No	Fluorescent light	No i do Not adjust the computer's brightness	No	No	No	TRUE	TRUE	FALSE	TRUE	TRUE	TRUE	TRUE	FALSE	Yes	8	Yes	7	Yes	8	Yes	9	Yes	6	Yes	10	Yes	8	Yes	7	Yes	7	Yes	0	No
Female	33-38	African	Mayaro	Rural	CAPE level	Not appropriate	Desktops	At eye level?	≤ 6 hours	< 5 Years	None at all	Yes	Anti reflective coating?	No	Natural light	No i do Not adjust the computer's brightness	No	No	No	TRUE	TRUE	TRUE	TRUE	TRUE	TRUE	TRUE	FALSE	Yes	7	No	2	No	0	Yes	3	Yes	8	Yes	5	Yes	3	Yes	8	No	2	No	1	Yes	Drink water, Visit optometrist/opthalmologist
Female	23-28	East Indian	Mayaro	Rural	CAPE level	Appropriate	Desktops	At eye level?	> 6 hours	< 5 Years	≤ 20 minutes	Yes	Anti reflective coating?	Yes	Natural light	I adjust computer brightness	No	Yes	No	TRUE	TRUE	TRUE	TRUE	TRUE	TRUE	TRUE	FALSE	Yes	4	No	0	No	0	Yes	5	No	0	Yes	9	Yes	4	Yes	3	Yes	2	No	0	No
Male	38-43	East Indian	Rio Claro	Rural	Bachelor’s degree	Appropriate	Desktops	Above eye level?	> 6 hours	≥ 5 Years	≤ 20 minutes	No		No	Fluorescent light	No i do Not adjust the computer's brightness	No	No	No	TRUE	TRUE	FALSE	TRUE	TRUE	TRUE	FALSE	TRUE	No	0	No	0	No	0	No	0	No	0	Yes	2	No	0	No	0	No	0	No	0	No
Female	28-33	East Indian	Rio Claro	Rural	CSEC level	Appropriate	Desktops	Above eye level?	> 6 hours	≥ 5 Years	>20 minutes	Yes	Anti reflective coating?	No	Fluorescent light	No i do Not adjust the computer's brightness	Yes	No	No	TRUE	TRUE	TRUE	TRUE	TRUE	TRUE	FALSE	FALSE	Yes	5	Yes	2	No	0	Yes	4	Yes	4	Yes	8	Yes	8	Yes	3	Yes	3	No	0	Yes	Use eye drops, Visit optometrist/opthalmologist, Obtain Specacles
Female	33-38	East Indian	Rio Claro	Rural	CAPE level	Appropriate	Desktops	At eye level?	> 6 hours	≥ 5 Years	>20 minutes	No		No	Natural light	No i do Not adjust the computer's brightness	No	No	No	TRUE	TRUE	TRUE	TRUE	TRUE	TRUE	FALSE	FALSE	No	2	No	0	No	0	Yes	4	No	0	No	0	No	1	No	0	No	0	No	0	Yes	Take breaks
Male	23-28	East Indian	Rio Claro	Rural	CSEC level	Appropriate	Desktops	At eye level?	> 6 hours	≥ 5 Years	≤ 20 minutes	No		No	Fluorescent light	I adjust computer brightness	No	No	No	FALSE	TRUE	TRUE	TRUE	TRUE	TRUE	FALSE	FALSE	Yes	6	No	0	No	0	Yes	5	Yes	5	Yes	6	No	0	No	0	No	0	No	0	Yes	Take breaks, Drink water, Visit optometrist/opthalmologist
Male	23-28	East Indian	Rio Claro	Urban	CSEC level	Not appropriate	Desktops	At eye level?	> 6 hours	≥ 5 Years	≤ 20 minutes	Yes	Anti reflective coating?	No	Fluorescent light	I adjust computer brightness	No	Yes	No	TRUE	TRUE	TRUE	TRUE	TRUE	TRUE	FALSE	FALSE	Yes	9	Yes	8	Yes	9	No	0	Yes	8	Yes	8	Yes	10	No	1	Yes	10	No	0	Yes	Take breaks, Drink water, Obtain Specacles
Female	43-48	African	Rio Claro	Rural	CAPE level	Appropriate	Desktops	At eye level?	> 6 hours	≥ 5 Years	≤ 20 minutes	Yes	Anti reflective coating?	No	Fluorescent light	No i do Not adjust the computer's brightness	No	Yes	No	TRUE	TRUE	TRUE	TRUE	TRUE	TRUE	FALSE	FALSE	Yes	7	Yes	7	No	0	Yes	3	Yes	6	Yes	8	No	1	No	2	No	1	No	1	Yes	Drink water, Visit optometrist/opthalmologist, Obtain Specacles
Female	23-28	African	Rio Claro	Urban	Bachelor’s degree	Not appropriate	Desktops	Above eye level?	> 6 hours	≥ 5 Years	None at all	Yes	Anti reflective coating?	Yes	Fluorescent light	I adjust computer brightness	Yes	No	No	TRUE	TRUE	TRUE	TRUE	TRUE	TRUE	FALSE	FALSE	Yes	9	Yes	8	Yes	4	Yes	10	Yes	9	Yes	10	Yes	10	Yes	8	Yes	5	Yes	3	Yes	Take breaks, Drink water, Use eye drops, Visit optometrist/opthalmologist
Male	23-28	Mixed D	Mayaro	Rural	CSEC level	Not appropriate	Desktops	At eye level?	> 6 hours	≥ 5 Years	≤ 20 minutes	No		Yes	Fluorescent light	I adjust computer brightness	Yes	No	No	TRUE	TRUE	TRUE	TRUE	TRUE	TRUE	FALSE	FALSE	Yes	10	Yes	10	No	4	No	0	No	0	Yes	8	Yes	8	Yes	7	No	0	Yes	5	Yes	Take breaks, Drink water
Female	18-23	African	Mayaro	Rural	CSEC level	Appropriate	Desktops	Below eye level?	> 6 hours	≥ 5 Years	>20 minutes	Yes		Yes	Natural light	No i do Not adjust the computer's brightness	Yes	No	No	TRUE	TRUE	TRUE	TRUE	TRUE	TRUE	FALSE	FALSE	Yes	4	Yes	4	No	0	Yes	4	Yes	6	Yes	5	No	0	Yes	5	No	0	No	0	No
Female	23-28	East Indian	Chaguanas	Urban	Bachelor’s degree	Appropriate	Desktops	Above eye level?	> 6 hours	≥ 5 Years	>20 minutes	Yes	Anti reflective coating?	Yes	Fluorescent light	I adjust computer brightness	Yes	Yes	No	TRUE	TRUE	TRUE	TRUE	TRUE	TRUE	FALSE	FALSE	Yes	7	Yes	6	Yes	5	Yes	7	Yes	10	Yes	7	Yes	10	Yes	10	Yes	10	No	0	Yes	Take breaks, Drink water, Use eye drops, Visit optometrist/opthalmologist, Obtain Specacles
Female	23-28	East Indian	Rio Claro	Rural	CAPE level	Appropriate	Desktops	At eye level?	> 6 hours	≥ 5 Years	>20 minutes	No		No	Natural light	No i do Not adjust the computer's brightness	No	No	No	TRUE	TRUE	TRUE	TRUE	TRUE	TRUE	TRUE	FALSE	Yes	7	Yes	9	Yes	5	Yes	3	Yes	4	Yes	2	Yes	7	No	0	Yes	4	No	0	Yes	Take breaks
Male	23-28	East Indian	Rio Claro	Rural	CAPE level	Appropriate	Desktops	At eye level?	> 6 hours	≥ 5 Years	≤ 20 minutes	No		No	Fluorescent light	I adjust computer brightness	Yes	Yes	No	TRUE	TRUE	TRUE	TRUE	TRUE	TRUE	FALSE	FALSE	Yes	8	Yes	2	No	0	No	0	Yes	7	Yes	6	No	0	No	0	No	0	Yes	8	Yes	Take breaks, Drink water
Male	23-28	East Indian	Rio Claro	Urban	CAPE level	Appropriate	Desktops	Below eye level?	> 6 hours	≥ 5 Years	≤ 20 minutes	Yes		No	Fluorescent light	No i do Not adjust the computer's brightness	No	No	No	TRUE	TRUE	TRUE	TRUE	TRUE	TRUE	TRUE	FALSE	Yes	9	Yes	9	No	0	Yes	7	Yes	9	Yes	9	Yes	6	Yes	7	No	0	Yes	9	No
Female	43-48	East Indian	Mayaro	Rural	Bachelor’s degree	Not appropriate	Desktops	At eye level?	> 6 hours	≥ 5 Years	≤ 20 minutes	Yes	Blue light blockers?	Yes	Fluorescent light	No i do Not adjust the computer's brightness	No	Yes	No	TRUE	TRUE	TRUE	TRUE	TRUE	TRUE	TRUE	FALSE	Yes	6	Yes	5	No	0	Yes	5	No	0	Yes	5	No	0	Yes	1	No	0	No	0	Yes	Take breaks, Drink water, Visit optometrist/opthalmologist
Female	33-38	Mixed	Mayaro	Rural	CAPE level	Appropriate	Desktops	At eye level?	≤ 6 hours	< 5 Years	>20 minutes	Yes	Blue light blockers?	No	Fluorescent light	No i do Not adjust the computer's brightness	No	Yes	No	TRUE	TRUE	TRUE	TRUE	TRUE	TRUE	TRUE	FALSE	Yes	7	Yes	7	Yes	4	Yes	4	No	1	Yes	4	Yes	7	Yes	5	Yes	5	No	3	Yes	Take breaks, Drink water, Visit optometrist/opthalmologist, Obtain Specacles
Male	28-33	East Indian	Mayaro	Rural	CAPE level	Not appropriate	Desktops	At eye level?	> 6 hours	≥ 5 Years	≤ 20 minutes	No		No	Fluorescent light	No i do Not adjust the computer's brightness	No	No	No	TRUE	TRUE	TRUE	TRUE	TRUE	TRUE	FALSE	FALSE	Yes	4	Yes	1	No	0	Yes	5	Yes	2	Yes	8	Yes	3	Yes	3	Yes	2	No	0	Yes	Take breaks, Drink water
Female	28-33	East Indian	Mayaro	Urban	Bachelor’s degree	Not appropriate	Desktops	At eye level?	> 6 hours	≥ 5 Years	None at all	Yes	Blue light blockers?	Yes	Fluorescent light	I adjust computer brightness	Yes	Yes	No	TRUE	TRUE	FALSE	FALSE	FALSE	TRUE	TRUE	TRUE	Yes	10	Yes	10	Yes	10	Yes	10	Yes	10	Yes	10	Yes	10	No	10	Yes	10	Yes	10	No	Drink water, Use eye drops, Visit optometrist/opthalmologist, Obtain Specacles
Female	18-23	Mixed	Rio Claro	Rural	Master’s degree	Appropriate	Desktops	At eye level?	> 6 hours	≥ 5 Years	≤ 20 minutes	Yes	Blue light blockers?	Yes	Fluorescent light	No i do Not adjust the computer's brightness	No	No	No	TRUE	TRUE	TRUE	TRUE	TRUE	TRUE	FALSE	FALSE	Yes	4	Yes	3	Yes	1	Yes	3	No	0	Yes	4	Yes	3	Yes	2	No	0	No	0	Yes	Take breaks, Drink water, Visit optometrist/opthalmologist, Obtain Specacles
Female	28-33	East Indian	Rio Claro	Urban	CSEC level	Not appropriate	Desktops	Above eye level?	> 6 hours	≥ 5 Years	≤ 20 minutes	Yes	Anti reflective coating?	No	Fluorescent light	No i do Not adjust the computer's brightness	Yes	Yes	No	TRUE	TRUE	TRUE	TRUE	TRUE	TRUE	FALSE	FALSE	Yes	8	Yes	8	Yes	3	Yes	10	Yes	5	Yes	7	Yes	7	Yes	6	Yes	7	No	0	Yes	Take breaks, Drink water, Visit optometrist/opthalmologist, Obtain Specacles
Male	33-38	East Indian	Chaguanas	Urban	Bachelor’s degree	Not appropriate	Desktops	At eye level?	> 6 hours	≥ 5 Years	≤ 20 minutes	Yes	Blue light blockers?	Yes	Fluorescent light	I adjust computer brightness	Yes	Yes	No	TRUE	TRUE	TRUE	TRUE	TRUE	TRUE	TRUE	FALSE	Yes	7	Yes	8	Yes	6	Yes	9	Yes	7	Yes	9	Yes	10	Yes	8	Yes	7	Yes	10	Yes	Take breaks, Drink water
Male	33-38	East Indian	Couva	Urban	Bachelor’s degree	Appropriate	Desktops	Below eye level?	> 6 hours	≥ 5 Years	None at all	No		No	Fluorescent light	I adjust computer brightness	Yes	No	Yes	TRUE	TRUE	TRUE	FALSE	TRUE	TRUE	TRUE	FALSE	Yes	7	Yes	8	Yes	7	Yes	9	Yes	8	Yes	7	Yes	7	Yes	8	Yes	8	Yes	7	Yes	Take breaks, Drink water, Use eye drops
Male	48-53	African	San Fernando	Urban	CAPE level	Not appropriate	Desktops	Below eye level?	> 6 hours	≥ 5 Years	None at all	Yes	Anti reflective coating?	Yes	Fluorescent light	No i do Not adjust the computer's brightness	No	No	No	TRUE	TRUE	TRUE	FALSE	TRUE	TRUE	TRUE	FALSE	Yes	7	Yes	7	Yes	6	Yes	5	Yes	4	Yes	7	No	0	No	0	No	0	No	0	Yes	Take breaks, Use eye drops, Visit optometrist/opthalmologist, Obtain Specacles
Female	18-23	Caucasian	Cunupia	Rural	Bachelor’s degree	Appropriate	Laptop	Below eye level?	> 6 hours	≥ 5 Years	None at all	Yes	Blue light blockers?	Yes	Fluorescent light	No i do Not adjust the computer's brightness	Yes	No	Yes	TRUE	TRUE	TRUE	TRUE	TRUE	TRUE	TRUE	FALSE	Yes	5	Yes	4	Yes	7	Yes	8	Yes	7	Yes	6	Yes	7	No	0	Yes	4	Yes	7	Yes	Take breaks, Visit optometrist/opthalmologist, Obtain Specacles
Female	23-28	Mixed	Chaguanas	Rural	Bachelor’s degree	Not appropriate	Desktops	Above eye level?	> 6 hours	< 5 Years	None at all	No		No	Fluorescent light	No i do Not adjust the computer's brightness	Yes	No	No	TRUE	TRUE	TRUE	TRUE	TRUE	TRUE	FALSE	FALSE	Yes	5	Yes	4	No	0	Yes	8	No	1	Yes	9	Yes	7	Yes	7	Yes	6	Yes	5	No	Take breaks, Drink water, Use eye drops
Female	33-38	East Indian	Mayaro	Mixed	CAPE level	Appropriate	Desktops	Above eye level?	> 6 hours	≥ 5 Years	>20 minutes	No		No	Fluorescent light	No i do Not adjust the computer's brightness	No	No	No	TRUE	TRUE	TRUE	TRUE	TRUE	TRUE	FALSE	FALSE	Yes	3	Yes	1	Yes	1	No	0	Yes	2	Yes	3	No	0	No	0	No	0	Yes	2	Yes	Take breaks
Female	23-28	African	Tunapuna	Urban	CSEC level	Appropriate	Desktops	Below eye level?	> 6 hours	< 5 Years	None at all	Yes	Blue light blockers?	No	Natural light	No i do Not adjust the computer's brightness	No	No	No	TRUE	TRUE	TRUE	FALSE	TRUE	TRUE	TRUE	FALSE	Yes	7	Yes	8	No	0	Yes	5	No	0	Yes	5	No	0	No	0	No	0	No	0	No
Female	28-33	East Indian	Valpark	Urban	CAPE level	Appropriate	Desktops	At eye level?	> 6 hours	≥ 5 Years	>20 minutes	Yes	Anti reflective coating?	Yes	Fluorescent light	No i do Not adjust the computer's brightness	Yes	No	No	TRUE	TRUE	TRUE	TRUE	TRUE	TRUE	FALSE	TRUE	Yes	8	Yes	8	Yes	8	Yes	8	Yes	8	Yes	8	Yes	5	No	2	Yes	7	Yes	8	Yes	Take breaks, Visit optometrist/opthalmologist, Obtain Specacles
Female	48-53	African	Tunapuna	Urban	CAPE level	Appropriate	Desktops	At eye level?	> 6 hours	≥ 5 Years	≤ 20 minutes	No		No	Natural light	No i do Not adjust the computer's brightness	No	No	No	TRUE	TRUE	TRUE	TRUE	TRUE	TRUE	FALSE	FALSE	Yes	5	Yes	4	Yes	3	No	0	Yes	2	Yes	8	Yes	4	Yes	2	Yes	2	Yes	4	Yes	Take breaks, Drink water, Use eye drops, Visit optometrist/opthalmologist
Male	28-33	African	Grand Bazaar	Urban	CSEC level	Not appropriate	Desktops	Above eye level?	> 6 hours	≥ 5 Years	>20 minutes	No		No	Fluorescent light	No i do Not adjust the computer's brightness	No	No	No	TRUE	TRUE	TRUE	TRUE	TRUE	TRUE	TRUE	FALSE	Yes	7	No	0	Yes	5	Yes	5	Yes	5	Yes	7	No	0	No	0	No	0	No	0	No
Female	28-33	African	Tunapuna	Rural	CSEC level	Appropriate	Desktops	At eye level?	≤ 6 hours	< 5 Years	None at all	No		No	Fluorescent light	No i do Not adjust the computer's brightness	Yes	No	Yes	TRUE	TRUE	TRUE	TRUE	TRUE	TRUE	FALSE	FALSE	Yes	5	No	0	No	0	Yes	5	No	0	No	0	No	0	Yes	5	No	0	Yes	6	Yes	Take breaks, Drink water, Use eye drops
Female	43-48	East Indian	Grand Bazaar	Rural	CSEC level	Appropriate	Desktops	At eye level?	> 6 hours	< 5 Years	≤ 20 minutes	Yes	Anti reflective coating?	Yes	Fluorescent light	No i do Not adjust the computer's brightness	No	Yes	Yes	FALSE	FALSE	TRUE	TRUE	TRUE	TRUE	FALSE	FALSE	Yes	4	Yes	7	Yes	7	Yes	6	Yes	7	Yes	7	Yes	8	Yes	8	No	8	Yes	9	Yes	Visit optometrist/opthalmologist
Male	23-28	African	Port Of spain	Urban	CSEC level	Appropriate	Desktops	Above eye level?	≤ 6 hours	< 5 Years	None at all	No		No	Fluorescent light	No i do Not adjust the computer's brightness	No	No	No	TRUE	TRUE	TRUE	TRUE	TRUE	TRUE	FALSE	FALSE	No	2	Yes	4	No	0	No	0	No	1	No	1	Yes	4	Yes	4	No	0	No	1	No
Female	43-48	African	Chaguanas	Urban	Bachelor’s degree	Appropriate	Desktops	Above eye level?	≤ 6 hours	< 5 Years	None at all	Yes	Blue light blockers?	Yes	Fluorescent light	No i do Not adjust the computer's brightness	No	No	Yes	FALSE	TRUE	TRUE	TRUE	TRUE	TRUE	FALSE	FALSE	Yes	7	Yes	6	No	0	No	0	Yes	9	Yes	8	Yes	6	Yes	6	No	0	Yes	5	No
Female	28-33	African	Chaguanas	Urban	CSEC level	Appropriate	Desktops	At eye level?	> 6 hours	≥ 5 Years	≤ 20 minutes	Yes	Anti reflective coating?	No	Natural light	I adjust computer brightness	No	Yes	No	TRUE	TRUE	TRUE	TRUE	TRUE	TRUE	FALSE	FALSE	Yes	7	Yes	7	Yes	5	Yes	9	Yes	9	Yes	8	Yes	8	Yes	9	Yes	6	Yes	7	No	Obtain Specacles
Male	33-38	African	Chaguanass	Urban	CAPE level	Not appropriate	Desktops	Above eye level?	> 6 hours	≥ 5 Years	None at all	Yes	Anti reflective coating?	No	Fluorescent light	No i do Not adjust the computer's brightness	No	No	No	TRUE	TRUE	FALSE	TRUE	TRUE	TRUE	FALSE	FALSE	No	0	No	0	No	0	Yes	6	No	0	No	1	No	0	No	0	No	1	No	0	No	Drink water
Female	43-48	Mixed Race	Rio Claro	Urban	Bachelor’s degree	Appropriate	Desktops	At eye level?	> 6 hours	≥ 5 Years	≤ 20 minutes	No		No	Fluorescent light	No i do Not adjust the computer's brightness	No	Yes	No	TRUE	TRUE	TRUE	TRUE	TRUE	TRUE	FALSE	FALSE	No	5	Yes	5	No	4	Yes	8	Yes	7	No	4	No	4	No	0	No	0	Yes	4	Yes	Visit optometrist/opthalmologist
Female	23-28	East Indian	Mayaro	Urban	CSEC level	Appropriate	Desktops	At eye level?	> 6 hours	≥ 5 Years	≤ 20 minutes	No		No	Natural light	I adjust computer brightness	No	No	No	TRUE	TRUE	TRUE	TRUE	FALSE	TRUE	TRUE	FALSE	Yes	9	Yes	9	No	0	Yes	7	No	0	Yes	2	Yes	5	Yes	5	Yes	8	Yes	4	Yes	Take breaks, Drink water, Use eye drops
Female	23-28	East Indian	Grand Bazaar	Urban	Master’s degree	Not appropriate	Desktops	At eye level?	≤ 6 hours	< 5 Years	≤ 20 minutes	Yes	Blue light blockers?	Yes	Natural light	I adjust computer brightness	Yes	No	No	TRUE	TRUE	TRUE	TRUE	TRUE	TRUE	FALSE	FALSE	Yes	8	Yes	8	No	0	Yes	10	No	0	Yes	8	No	0	No	0	Yes	8	Yes	9	Yes	Take breaks, Drink water, Obtain Specacles
Female	33-38	African	Arima	Urban	Bachelor’s degree	Appropriate	Desktops	Above eye level?	≤ 6 hours	< 5 Years	>20 minutes	No		Yes	Fluorescent light	No i do Not adjust the computer's brightness	Yes	No	No	TRUE	TRUE	TRUE	TRUE	TRUE	TRUE	FALSE	FALSE	Yes	8	Yes	3	Yes	2	Yes	4	Yes	10	Yes	4	No	2	No	1	No	1	Yes	2	Yes	Take breaks, Drink water
Female	18-23	African	Tunapuna	Urban	CSEC level	Appropriate	Desktops	At eye level?	> 6 hours	< 5 Years	None at all	No		No	Fluorescent light	No i do Not adjust the computer's brightness	No	No	No	TRUE	TRUE	TRUE	TRUE	TRUE	TRUE	TRUE	FALSE	Yes	8	Yes	6	No	0	Yes	9	No	0	Yes	5	No	0	No	0	No	0	Yes	5	Yes	Drink water
Female	23-28	African	Tunapuna	Urban	Bachelor’s degree	Appropriate	Desktops	Below eye level?	> 6 hours	≥ 5 Years	>20 minutes	Yes	Anti reflective coating?	Yes	Natural light	No i do Not adjust the computer's brightness	Yes	No	No	TRUE	TRUE	TRUE	TRUE	TRUE	TRUE	FALSE	FALSE	Yes	7	No	0	No	0	Yes	9	No	0	Yes	9	Yes	6	No	0	Yes	4	No	0	Yes	Take breaks, Visit optometrist/opthalmologist, Obtain Specacles
Female	18-23	African	Port Of Spain	Urban	Bachelor’s degree	Appropriate	Desktops	At eye level?	> 6 hours	≥ 5 Years	≤ 20 minutes	No		Yes	Natural light	No i do Not adjust the computer's brightness	No	No	No	TRUE	TRUE	TRUE	TRUE	TRUE	TRUE	TRUE	FALSE	Yes	5	No	0	No	0	No	0	No	0	No	0	Yes	8	Yes	6	Yes	10	Yes	2	No	Take breaks, Drink water, Use eye drops
Female	43-48	Mixed	Republic Bank	Urban	Master’s degree	Appropriate	Desktops	Above eye level?	> 6 hours	≥ 5 Years	>20 minutes	Yes	Blue light blockers?	Yes	Fluorescent light	No i do Not adjust the computer's brightness	No	Yes	No	TRUE	TRUE	TRUE	TRUE	TRUE	TRUE	FALSE	FALSE	Yes	5	No	0	Yes	7	No	0	Yes	7	Yes	7	No	0	Yes	7	No	0	No	0	Yes	Take breaks, Drink water, Use eye drops, Visit optometrist/opthalmologist, Obtain Specacles
Female	23-28	African	Aranaguez	Semi-agricultural/urban	CSEC level	Appropriate	Cellular Phone	At eye level?	≤ 6 hours	< 5 Years	>20 minutes	Yes	Blue light blockers?	Yes	Fluorescent light	I adjust computer brightness	No	No	No	TRUE	TRUE	TRUE	TRUE	TRUE	TRUE	FALSE	FALSE	No	0	Yes	5	No	0	No	0	Yes	3	Yes	5	Yes	4	Yes	4	No	0	No	0	Yes	Take breaks, Other
Male	23-28	Mixed	Aranguez	Urban	CAPE level	Not appropriate	Desktops	At eye level?	> 6 hours	≥ 5 Years	>20 minutes	Yes	Blue light blockers?	Yes	Fluorescent light	I adjust computer brightness	No	Yes	No	TRUE	TRUE	TRUE	TRUE	TRUE	TRUE	FALSE	FALSE	Yes	2	Yes	1	No	0	No	0	No	0	Yes	2	No	0	No	0	Yes	1	Yes	1	Yes	Obtain Specacles
Female	28-33	East Indian	Aranguez	Urban	Master’s degree	Not appropriate	Desktops	Above eye level?	> 6 hours	≥ 5 Years	>20 minutes	No		Yes	Fluorescent light	No i do Not adjust the computer's brightness	Yes	No	No	TRUE	TRUE	TRUE	TRUE	TRUE	TRUE	TRUE	FALSE	Yes	5	No	0	No	0	Yes	6	No	0	No	2	No	0	No	1	No	0	No	0	No
Female	33-38	African	Aranguez	Urban	Bachelor’s degree	Appropriate	Desktops	Above eye level?	≤ 6 hours	< 5 Years	≤ 20 minutes	Yes	Anti reflective coating?	No	Fluorescent light	No i do Not adjust the computer's brightness	No	No	No	TRUE	TRUE	TRUE	TRUE	TRUE	TRUE	TRUE	FALSE	No	8	No	8	Yes	5	No	0	Yes	7	No	6	Yes	6	No	6	Yes	6	No	0	No
Female	18-23	African	Aranguez	Urban	Bachelor’s degree	Appropriate	Desktops	At eye level?	> 6 hours	≥ 5 Years	≤ 20 minutes	No		No	Fluorescent light	I adjust computer brightness	No	No	No	TRUE	TRUE	TRUE	TRUE	TRUE	TRUE	FALSE	FALSE	Yes	5	No	4	No	0	Yes	7	No	3	Yes	5	Yes	7	Yes	7	Yes	7	No	3	No
Female	28-33	African	Aranguez	Urban	CSEC level	Not appropriate	Desktops	At eye level?	> 6 hours	< 5 Years	≤ 20 minutes	No		No	Natural light	I adjust computer brightness	Yes	No	No	TRUE	TRUE	TRUE	TRUE	TRUE	TRUE	FALSE	FALSE	Yes	8	Yes	5	Yes	6	Yes	9	No	2	Yes	8	Yes	3	Yes	4	Yes	7	Yes	6	Yes	Take breaks, Visit optometrist/opthalmologist, Obtain Specacles
Female	28-33	African	Aranguez	Rural	Bachelor’s degree	Not appropriate	Laptop	At eye level?	> 6 hours	< 5 Years	None at all	Yes	Anti reflective coating?	No	Fluorescent light	No i do Not adjust the computer's brightness	Yes	No	No	TRUE	TRUE	TRUE	TRUE	TRUE	TRUE	FALSE	TRUE	Yes	10	Yes	10	No	0	Yes	10	Yes	8	Yes	8	Yes	9	Yes	10	No	2	No	4	No
Male	23-28	East Indian	Aranguez	Urban	CAPE level	Appropriate	Cellular Phone	Below eye level?	≤ 6 hours	< 5 Years	None at all	Yes	Anti reflective coating?	No	Fluorescent light	No i do Not adjust the computer's brightness	Yes	No	No	TRUE	TRUE	TRUE	TRUE	TRUE	TRUE	FALSE	FALSE	No	2	No	2	No	1	No	1	No	1	Yes	7	No	1	No	1	Yes	7	No	1	No
Female	33-38	African	Aranguez	Urban	Bachelor’s degree	Appropriate	Laptop	At eye level?	≤ 6 hours	< 5 Years	None at all	Yes	Blue light blockers?	No	Fluorescent light	I adjust computer brightness	No	Yes	No	TRUE	TRUE	TRUE	TRUE	TRUE	TRUE	FALSE	FALSE	Yes	4	Yes	3	No	0	Yes	2	Yes	2	Yes	6	No	0	Yes	5	No	0	No	0	Yes	Take breaks, Visit optometrist/opthalmologist, Obtain Specacles
Female	23-28	Mixed race	Aranguez	Rural	CAPE level	Appropriate	Cellular Phone	Above eye level?	≤ 6 hours	≥ 5 Years	None at all	No		No	Fluorescent light	No i do Not adjust the computer's brightness	Yes	No	No	TRUE	TRUE	TRUE	TRUE	TRUE	TRUE	FALSE	FALSE	Yes	6	Yes	4	Yes	6	Yes	9	Yes	10	Yes	10	Yes	10	Yes	7	Yes	9	No	0	No
Female	23-28	African	Valpark	Sub urban, lots of agricultural land around	Bachelor’s degree	Appropriate	Laptop	At eye level?	≤ 6 hours	≥ 5 Years	>20 minutes	No		No	Fluorescent light	No i do Not adjust the computer's brightness	No	No	No	TRUE	TRUE	TRUE	TRUE	TRUE	TRUE	FALSE	FALSE	Yes	4	No	0	No	0	Yes	7	No	0	Yes	5	Yes	3	Yes	6	Yes	3	No	1	Yes	Take breaks, Drink water
Male	38-43	African	Aranguez	Rural	CSEC level	Appropriate	Desktops	At eye level?	≤ 6 hours	≥ 5 Years	>20 minutes	No		No	Fluorescent light	No i do Not adjust the computer's brightness	No	No	No	TRUE	TRUE	TRUE	TRUE	TRUE	TRUE	FALSE	TRUE	No	0	No	0	Yes	4	No	0	No	0	No	0	No	0	No	0	No	0	No	0	No
Male	28-33	African	Aranguez	Rural	CAPE level	Appropriate	Desktops	At eye level?	> 6 hours	< 5 Years	None at all	No		No	Fluorescent light	No i do Not adjust the computer's brightness	No	No	No	TRUE	TRUE	TRUE	TRUE	TRUE	TRUE	FALSE	FALSE	No	0	No	0	Yes	2	Yes	5	No	0	No	0	No	0	No	0	No	0	No	0	No
Male	18-23	African	Aranguez	Urban	Bachelor’s degree	Appropriate	Desktops	Below eye level?	> 6 hours	< 5 Years	≤ 20 minutes	Yes	Blue light blockers?	No	Fluorescent light	No i do Not adjust the computer's brightness	No	Yes	No	TRUE	TRUE	TRUE	TRUE	TRUE	TRUE	FALSE	FALSE	No	0	No	0	No	0	Yes	3	No	0	No	0	No	0	No	0	No	0	No	0	No
Female	33-38	African	Aranguez	Rural	CAPE level	Appropriate	Desktops	Above eye level?	≤ 6 hours	≥ 5 Years	>20 minutes	Yes	Anti reflective coating?	Yes	Fluorescent light	No i do Not adjust the computer's brightness	Yes	Yes	No	TRUE	TRUE	TRUE	TRUE	TRUE	TRUE	FALSE	FALSE	Yes	7	Yes	9	Yes	9	Yes	8	Yes	7	Yes	9	Yes	6	Yes	8	No	3	No	0	Yes	Take breaks, Drink water, Use eye drops, Visit optometrist/opthalmologist, Obtain Specacles
Male	28-33	African	Aranguez	Urban	CSEC level	Not appropriate	Desktops	Above eye level?	≤ 6 hours	< 5 Years	≤ 20 minutes	No		Yes	Fluorescent light	No i do Not adjust the computer's brightness	No	No	No	TRUE	TRUE	TRUE	TRUE	TRUE	TRUE	FALSE	FALSE	No	0	Yes	3	Yes	5	Yes	9	No	0	Yes	7	No	0	Yes	5	No	0	No	0	Yes	Take breaks, Drink water
Female	18-23	African	Aranguez	Rural	CAPE level	Appropriate	Laptop	At eye level?	≤ 6 hours	< 5 Years	None at all	No		No	Fluorescent light	No i do Not adjust the computer's brightness	No	Yes	No	TRUE	TRUE	TRUE	TRUE	TRUE	TRUE	FALSE	FALSE	No	0	No	0	No	0	No	0	No	0	Yes	4	No	0	No	0	No	0	No	0	No
Female	33-38	African	Port Of spain	Urban	Master’s degree	Appropriate	Laptop	Below eye level?	> 6 hours	≥ 5 Years	≤ 20 minutes	Yes		Yes	Natural light	I adjust computer brightness	No	No	No	TRUE	TRUE	TRUE	TRUE	TRUE	TRUE	FALSE	FALSE	Yes	8	Yes	7	Yes	3	Yes	9	No	0	Yes	9	No	2	No	2	No	0	Yes	4	Yes	Take breaks, Drink water
Female	23-28	Mixed	Chaguanas	Urban	Bachelor’s degree	Not appropriate	Desktops	At eye level?	> 6 hours	≥ 5 Years	None at all	No		Yes	Fluorescent light	No i do Not adjust the computer's brightness	No	No	No	TRUE	TRUE	FALSE	TRUE	TRUE	TRUE	FALSE	FALSE	Yes	4	Yes	6	No	0	Yes	7	Yes	4	Yes	8	Yes	5	No	0	No	0	Yes	6	No
Male	23-28	East Indian	Aranguez	Somewhat both	CAPE level	Not appropriate	Desktops	At eye level?	> 6 hours	< 5 Years	≤ 20 minutes	No		Yes	Fluorescent light	No i do Not adjust the computer's brightness	No	No	No	TRUE	TRUE	TRUE	TRUE	TRUE	TRUE	FALSE	FALSE	Yes	5	Yes	4	No	0	No	0	Yes	5	Yes	6	Yes	7	Yes	4	No	0	No	0	No
Female	28-33	African	San Juan	Urban	Bachelor’s degree	Appropriate	Desktops	Below eye level?	> 6 hours	≥ 5 Years	≤ 20 minutes	Yes	Blue light blockers?	Yes	Fluorescent light	No i do Not adjust the computer's brightness	Yes	Yes	No	TRUE	TRUE	TRUE	TRUE	TRUE	TRUE	FALSE	FALSE	Yes	6	Yes	6	Yes	4	Yes	5	Yes	3	Yes	5	Yes	6	Yes	5	Yes	3	No	0	No
Male	33-38	African	Aranguez	Urban	Bachelor’s degree	Appropriate	Desktops	Above eye level?	> 6 hours	≥ 5 Years	≤ 20 minutes	No		No	Fluorescent light	I adjust computer brightness	No	Yes	No	TRUE	TRUE	TRUE	TRUE	TRUE	TRUE	FALSE	FALSE	Yes	7	No	0	No	0	Yes	10	Yes	10	Yes	10	Yes	10	Yes	8	Yes	8	No	0	Yes	Take breaks, Use eye drops
Female	43-48	African	Aranguez	Urban	CSEC level	Not appropriate	Desktops	At eye level?	> 6 hours	≥ 5 Years	None at all	Yes	Anti reflective coating?	Yes	Fluorescent light	I adjust computer brightness	No	Yes	Yes	FALSE	FALSE	TRUE	TRUE	TRUE	TRUE	FALSE	TRUE	No	0	Yes	5	Yes	5	No	0	No	0	Yes	5	No	0	Yes	5	Yes	6	Yes	4	Yes	Visit optometrist/opthalmologist
Female	33-38	East Indian	Aranguez	Urban	CSEC level	Appropriate	Desktops	At eye level?	≤ 6 hours	≥ 5 Years	>20 minutes	No		No	Fluorescent light	I adjust computer brightness	Yes	No	No	TRUE	TRUE	TRUE	TRUE	TRUE	TRUE	FALSE	FALSE	Yes	6	Yes	7	No	0	No	1	No	0	Yes	3	Yes	2	No	0	No	0	Yes	3	No	Take breaks
Male	33-38	East Indian	Tunapuna	Urban	Bachelor’s degree	Appropriate	Desktops	Below eye level?	> 6 hours	≥ 5 Years	None at all	Yes	Blue light blockers?	No	Fluorescent light	No i do Not adjust the computer's brightness	No	No	No	TRUE	TRUE	TRUE	TRUE	TRUE	TRUE	FALSE	FALSE	Yes	7	No	0	No	0	Yes	8	Yes	8	Yes	8	Yes	8	Yes	5	No	0	No	6	No
Female	18-23	African	Mayaro	sub urban	CAPE level	Appropriate	Desktops	Above eye level?	> 6 hours	≥ 5 Years	≤ 20 minutes	No		No	Fluorescent light	No i do Not adjust the computer's brightness	No	No	Yes	TRUE	TRUE	TRUE	TRUE	TRUE	TRUE	TRUE	FALSE	Yes	6	No	0	Yes	6	Yes	8	Yes	8	Yes	7	No	0	No	0	No	0	No	0	Yes	Take breaks, Use eye drops
Male	38-43	African	Chaguanas	Urban	Bachelor’s degree	Appropriate	Laptop	Above eye level?	> 6 hours	≥ 5 Years	None at all	No		Yes	Fluorescent light	I adjust computer brightness	Yes	No	No	TRUE	TRUE	TRUE	TRUE	TRUE	TRUE	FALSE	FALSE	Yes	7	Yes	7	Yes	7	Yes	7	No	0	No	0	Yes	6	No	7	No	7	Yes	7	No
Female	33-38	East Indian	Cunupia	Urban	Bachelor’s degree	Appropriate	Desktops	Above eye level?	> 6 hours	≥ 5 Years	None at all	Yes	Anti reflective coating?	No	Fluorescent light	No i do Not adjust the computer's brightness	No	No	No	TRUE	TRUE	TRUE	FALSE	TRUE	FALSE	TRUE	TRUE	No	0	No	0	Yes	7	Yes	7	Yes	7	Yes	5	No	0	Yes	4	Yes	7	No	0	Yes	Take breaks, Drink water, Obtain Specacles
Female	18-23	mixed with everything	Cunupia	Urban	CAPE level	Not appropriate	Desktops	Above eye level?	> 6 hours	≥ 5 Years	>20 minutes	Yes	Anti reflective coating?	Yes	Fluorescent light	I adjust computer brightness	No	Yes	No	TRUE	TRUE	TRUE	TRUE	TRUE	TRUE	TRUE	FALSE	No	0	No	0	Yes	6	Yes	6	Yes	5	No	0	No	0	No	0	No	4	No	0	Yes	Take breaks, Visit optometrist/opthalmologist, Obtain Specacles
Male	33-38	African	Cunupia	Not completely urban	Bachelor’s degree	Appropriate	Desktops	Above eye level?	> 6 hours	≥ 5 Years	>20 minutes	Yes	Anti reflective coating?	Yes	Fluorescent light	No i do Not adjust the computer's brightness	No	No	No	TRUE	TRUE	TRUE	TRUE	TRUE	TRUE	FALSE	FALSE	Yes	8	No	8	No	0	Yes	8	Yes	8	No	0	Yes	5	No	0	Yes	7	No	0	Yes	Visit optometrist/opthalmologist, Obtain Specacles
Male	43-48	East Indian	Chaguanas	Rural	Bachelor’s degree	Appropriate	Desktops	At eye level?	> 6 hours	≥ 5 Years	None at all	No		No	Fluorescent light	I adjust computer brightness	No	No	Yes	TRUE	TRUE	TRUE	FALSE	TRUE	TRUE	TRUE	FALSE	No	0	Yes	8	No	7	Yes	7	Yes	8	No	0	No	0	No	0	Yes	5	No	0	No
Male	18-23	African	Port Of spain	Urban	CAPE level	Appropriate	Desktops	At eye level?	> 6 hours	< 5 Years	≤ 20 minutes	No		No	Natural light	No i do Not adjust the computer's brightness	Yes	No	No	TRUE	TRUE	TRUE	TRUE	TRUE	TRUE	TRUE	TRUE	Yes	5	No	0	No	0	No	0	Yes	4	No	0	Yes	4	Yes	4	Yes	3	No	0	No
Male	33-38	African	Aranguez	Urban	Bachelor’s degree	Not appropriate	Desktops	At eye level?	> 6 hours	≥ 5 Years	≤ 20 minutes	No		Yes	Fluorescent light	No i do Not adjust the computer's brightness	No	No	No	TRUE	TRUE	TRUE	TRUE	TRUE	TRUE	FALSE	TRUE	Yes	3	No	0	No	0	No	0	Yes	3	Yes	4	No	0	Yes	3	No	0	No	0	No
Female	33-38	East Indian	Tunapuna	Urban	Master’s degree	Appropriate	Laptop	Below eye level?	> 6 hours	≥ 5 Years	≤ 20 minutes	Yes	Anti reflective coating?	Yes	Fluorescent light	I adjust computer brightness	Yes	Yes	No	TRUE	TRUE	TRUE	TRUE	TRUE	TRUE	FALSE	TRUE	No	0	Yes	4	Yes	5	Yes	8	Yes	6	Yes	5	Yes	5	Yes	4	No	0	No	0	Yes	Take breaks, Drink water, Use eye drops
Female	28-33	African	San Juan	Urban	CSEC level	Not appropriate	Desktops	Below eye level?	> 6 hours	≥ 5 Years	≤ 20 minutes	Yes	Anti reflective coating?	No	Fluorescent light	No i do Not adjust the computer's brightness	No	Yes	No	TRUE	TRUE	TRUE	TRUE	TRUE	TRUE	FALSE	FALSE	Yes	4	No	0	Yes	3	Yes	7	No	0	Yes	4	Yes	5	Yes	5	No	0	No	0	No
Female	23-28	East Indian	Aranguez	both	Bachelor’s degree	Appropriate	Desktops	Below eye level?	≤ 6 hours	< 5 Years	≤ 20 minutes	No		Yes	Fluorescent light	No i do Not adjust the computer's brightness	No	No	No	TRUE	TRUE	TRUE	TRUE	TRUE	TRUE	FALSE	FALSE	No	0	Yes	3	Yes	4	No	0	No	0	No	0	No	0	No	0	Yes	3	No	0	Yes	Take breaks
Male	28-33	East Indian	Chaguanas	Urban	CAPE level	Appropriate	Laptop	Below eye level?	> 6 hours	< 5 Years	≤ 20 minutes	Yes	Blue light blockers?	No	Fluorescent light	No i do Not adjust the computer's brightness	No	Yes	No	TRUE	TRUE	TRUE	TRUE	TRUE	TRUE	FALSE	FALSE	Yes	6	Yes	4	No	0	No	0	No	0	Yes	4	Yes	6	Yes	4	No	0	No	0	No
Male	33-38	African	Aranguez	Urban	Bachelor’s degree	Appropriate	Laptop	At eye level?	≤ 6 hours	≥ 5 Years	≤ 20 minutes	Yes	Anti reflective coating?	No	Fluorescent light	No i do Not adjust the computer's brightness	No	No	No	TRUE	TRUE	TRUE	TRUE	TRUE	TRUE	TRUE	FALSE	Yes	7	No	6	No	4	No	3	No	4	Yes	7	Yes	7	No	6	No	6	No	6	No
Male	38-43	African	Aranguez	Urban	Bachelor’s degree	Not appropriate	Desktops	Below eye level?	> 6 hours	≥ 5 Years	≤ 20 minutes	No		Yes	Fluorescent light	I adjust computer brightness	No	No	No	TRUE	TRUE	TRUE	FALSE	TRUE	TRUE	FALSE	FALSE	Yes	7	Yes	5	Yes	5	No	0	No	0	Yes	6	Yes	6	Yes	6	No	0	No	0	Yes	Take breaks, Visit optometrist/opthalmologist
Female	38-43	East Indian	Aranguez	Urban	CAPE level	Appropriate	Desktops	At eye level?	> 6 hours	≥ 5 Years	≤ 20 minutes	Yes	Blue light blockers?	No	Fluorescent light	No i do Not adjust the computer's brightness	No	No	Yes	TRUE	TRUE	TRUE	TRUE	TRUE	TRUE	FALSE	FALSE	Yes	6	Yes	5	Yes	8	No	0	Yes	5	Yes	6	Yes	5	Yes	6	No	0	No	0	Yes	Take breaks, Drink water
Female	18-23	African	Aranguez	Urban	CAPE level	Not appropriate	Desktops	At eye level?	≤ 6 hours	< 5 Years	≤ 20 minutes	Yes	Blue light blockers?	Yes	Fluorescent light	No i do Not adjust the computer's brightness	Yes	Yes	No	TRUE	TRUE	TRUE	TRUE	TRUE	TRUE	FALSE	FALSE	Yes	5	Yes	8	Yes	3	Yes	3	Yes	4	Yes	4	Yes	5	Yes	5	No	0	No	0	Yes	Take breaks, Visit optometrist/opthalmologist
Female	28-33	East Indian	Aranguez	Urban	CSEC level	Appropriate	Desktops	At eye level?	> 6 hours	≥ 5 Years	≤ 20 minutes	Yes	Blue light blockers?	Yes	Fluorescent light	No i do Not adjust the computer's brightness	No	Yes	No	TRUE	TRUE	TRUE	TRUE	TRUE	TRUE	TRUE	FALSE	Yes	5	Yes	5	Yes	5	No	0	Yes	4	Yes	7	Yes	6	Yes	6	Yes	2	No	0	Yes	Take breaks, Drink water, Use eye drops
Female	18-23	African	Aranguez	Urban	CSEC level	Not appropriate	Desktops	At eye level?	≤ 6 hours	< 5 Years	≤ 20 minutes	No		No	Fluorescent light	I adjust computer brightness	No	No	No	TRUE	TRUE	TRUE	TRUE	TRUE	TRUE	TRUE	FALSE	Yes	4	Yes	3	Yes	2	Yes	4	Yes	3	Yes	2	Yes	3	No	0	No	0	No	0	Yes	Take breaks
Female	23-28	African	Aranguez	Urban	CSEC level	Not appropriate	Desktops	Below eye level?	≤ 6 hours	< 5 Years	>20 minutes	Yes	Blue light blockers?	Yes	Fluorescent light	I adjust computer brightness	No	Yes	No	TRUE	TRUE	TRUE	TRUE	TRUE	TRUE	FALSE	FALSE	Yes	3	Yes	5	Yes	2	No	0	Yes	2	Yes	3	Yes	3	Yes	5	Yes	2	No	0	Yes	Take breaks, Drink water, Use eye drops, Obtain Specacles
Female	18-23	East Indian	Rio Claro	Rural	CAPE level	Appropriate	Desktops	Above eye level?	> 6 hours	?5 years	None at all	No		No	Fluorescent light	I adjust computer brightness	No	No	No	TRUE	TRUE	TRUE	TRUE	TRUE	TRUE	TRUE	FALSE	No	0	No	0	No	0	No	0	Yes	5	No	0	No	0	No	0	No	0	No	0	No
Female	23-28	African	Aranguez	Urban	CAPE level	Appropriate	Laptop	Below eye level?	≤ 6 hours	< 5 Years	≤ 20 minutes	Yes	Blue light blockers?	Yes	Fluorescent light	No i do Not adjust the computer's brightness	Yes	No	No	TRUE	TRUE	TRUE	TRUE	TRUE	TRUE	FALSE	FALSE	Yes	4	Yes	5	Yes	6	Yes	2	No	0	Yes	4	Yes	8	Yes	8	Yes	2	No	0	Yes	Take breaks, Drink water, Use eye drops, Obtain Specacles
Male	28-33	African	Aranguez	Urban	Bachelor’s degree	Not appropriate	Laptop	Below eye level?	> 6 hours	≥ 5 Years	≤ 20 minutes	Yes	Blue light blockers?	No	Fluorescent light	No i do Not adjust the computer's brightness	Yes	Yes	No	FALSE	TRUE	TRUE	TRUE	TRUE	TRUE	TRUE	FALSE	Yes	6	Yes	5	Yes	4	Yes	7	Yes	3	Yes	5	Yes	9	Yes	6	Yes	4	Yes	2	Yes	Take breaks, Drink water
Female	43-48	East Indian	Aranguez	Urban	Bachelor’s degree	Not appropriate	Laptop	Below eye level?	> 6 hours	≥ 5 Years	None at all	Yes	Blue light blockers?	No	Fluorescent light	No i do Not adjust the computer's brightness	No	No	Yes	TRUE	TRUE	TRUE	FALSE	TRUE	TRUE	TRUE	TRUE	Yes	7	Yes	5	Yes	5	No	0	Yes	5	Yes	5	Yes	6	Yes	6	Yes	4	No	0	Yes	Take breaks, Visit optometrist/opthalmologist, Obtain Specacles
Male	43-48	East Indian	Cunupia	Urban	CSEC level	Appropriate	Desktops	At eye level?	> 6 hours	≥ 5 Years	≤ 20 minutes	Yes	Anti reflective coating?	No	Fluorescent light	I adjust computer brightness	Yes	Yes	Yes	TRUE	TRUE	TRUE	TRUE	TRUE	TRUE	TRUE	TRUE	Yes	5	No	0	No	0	Yes	4	Yes	4	Yes	6	Yes	8	Yes	4	No	0	No	0	No
Female	43-48	African	Aranguez	Rural	Master’s degree	Appropriate	Desktops	At eye level?	> 6 hours	≥ 5 Years	≤ 20 minutes	Yes	Anti reflective coating?	Yes	Fluorescent light	No i do Not adjust the computer's brightness	No	No	No	TRUE	TRUE	TRUE	TRUE	TRUE	TRUE	FALSE	FALSE	No	0	No	0	Yes	3	Yes	7	Yes	4	Yes	7	Yes	6	Yes	6	No	0	No	0	Yes	Obtain Specacles
Female	53-58	Mixed	San Fernando	Urban	CAPE level	Appropriate	Desktops	At eye level?	> 6 hours	≥ 5 Years	≤ 20 minutes	Yes	Anti reflective coating?	Yes	Fluorescent light	No i do Not adjust the computer's brightness	No	Yes	No	TRUE	TRUE	TRUE	TRUE	TRUE	TRUE	FALSE	FALSE	Yes	8	No	0	No	0	Yes	8	No	0	Yes	7	Yes	7	Yes	8	No	0	No	0	Yes	Take breaks
Female	18-23	Mixed	Cunupia	Rural	Bachelor’s degree	Not appropriate	Desktops	At eye level?	> 6 hours	≥ 5 Years	>20 minutes	Yes	Blue light blockers?	Yes	Fluorescent light	No i do Not adjust the computer's brightness	No	Yes	No	TRUE	TRUE	TRUE	TRUE	TRUE	TRUE	FALSE	FALSE	Yes	5	No	4	Yes	6	Yes	3	Yes	6	Yes	5	Yes	7	Yes	6	No	3	No	0	Yes	Take breaks, Drink water, Use eye drops, Visit optometrist/opthalmologist, Obtain Specacles
Female	23-28	African	Aranguez	Rural	CAPE level	Appropriate	Desktops	Above eye level?	> 6 hours	≥ 5 Years	None at all	No		No	Fluorescent light	No i do Not adjust the computer's brightness	No	No	No	TRUE	TRUE	TRUE	TRUE	TRUE	TRUE	FALSE	FALSE	No	0	No	0	No	0	No	0	No	0	No	0	No	0	No	0	No	0	No	0	No
Female	38-43	African	Aranguez	Urban	Bachelor’s degree	Not appropriate	Desktops	At eye level?	> 6 hours	≥ 5 Years	≤ 20 minutes	Yes	Anti reflective coating?	No	Natural light	No i do Not adjust the computer's brightness	Yes	Yes	Yes	TRUE	FALSE	FALSE	TRUE	TRUE	TRUE	FALSE	FALSE	Yes	5	No	0	No	0	No	0	No	0	Yes	6	Yes	4	Yes	2	Yes	3	No	0	Yes	Take breaks
Female	48-53	African	Tunapuna	Urban	Bachelor’s degree	Not appropriate	Laptop	Above eye level?	> 6 hours	≥ 5 Years	>20 minutes	Yes	Blue light blockers?	Yes	Natural light	No i do Not adjust the computer's brightness	Yes	No	No	TRUE	TRUE	FALSE	TRUE	TRUE	TRUE	TRUE	FALSE	Yes	7	Yes	7	Yes	8	Yes	9	Yes	8	Yes	8	No	0	No	0	No	0	No	0	Yes	Use eye drops, Visit optometrist/opthalmologist, Obtain Specacles
Female	53-58	African	Aranguez	Somewhat both	Master’s degree	Not appropriate	Laptop	Below eye level?	> 6 hours	≥ 5 Years	≤ 20 minutes	No		Yes	Natural light	I adjust computer brightness	Yes	Yes	No	TRUE	TRUE	TRUE	TRUE	TRUE	TRUE	FALSE	TRUE	Yes	3	No	0	Yes	3	No	0	Yes	4	Yes	3	No	0	No	0	No	0	No	0	No
Male	38-43	East Indian	Rio Claro	Rural	CAPE level	Appropriate	Desktops	At eye level?	> 6 hours	≥ 5 Years	>20 minutes	Yes	Anti reflective coating?	Yes	Fluorescent light	I adjust computer brightness	No	Yes	Yes	TRUE	TRUE	TRUE	TRUE	TRUE	TRUE	FALSE	TRUE	No	0	No	0	No	0	Yes	6	No	0	Yes	8	Yes	7	Yes	7	No	0	No	1	Yes	Use eye drops, Visit optometrist/opthalmologist, Obtain Specacles
Male	18-23	African	Cunupia	Suburban	Bachelor’s degree	Appropriate	Desktops	Above eye level?	> 6 hours	≥ 5 Years	≤ 20 minutes	Yes	Anti reflective coating?	Yes	Fluorescent light	I adjust computer brightness	Yes	No	Yes	TRUE	TRUE	TRUE	TRUE	TRUE	TRUE	TRUE	FALSE	No	0	Yes	7	Yes	0	Yes	0	Yes	8	Yes	8	Yes	8	Yes	8	No	0	No	0	Yes	Take breaks
Female	18-23	Asian	Aranguez	Rural	CSEC level	Appropriate	Cellular Phone	Above eye level?	≤ 6 hours	< 5 Years	None at all	Yes	Blue light blockers?	No	Natural light	No i do Not adjust the computer's brightness	No	No	No	TRUE	TRUE	TRUE	FALSE	TRUE	TRUE	FALSE	FALSE	No	0	No	0	Yes	2	No	0	Yes	4	Yes	4	Yes	4	Yes	4	No	0	No	0	Yes	Take breaks, Drink water, Obtain Specacles
Male	18-23	Mixed	Aranguez	Urban	CSEC level	Appropriate	Cellular Phone	At eye level?	≤ 6 hours	< 5 Years	None at all	No		Yes	Fluorescent light	No i do Not adjust the computer's brightness	No	No	No	TRUE	TRUE	TRUE	TRUE	TRUE	TRUE	TRUE	FALSE	No	0	No	0	Yes	3	Yes	6	No	0	Yes	3	Yes	3	No	0	No	0	No	0	No
Female	28-33	East Indian	Couva	Rural	Bachelor’s degree	Not appropriate	Desktops	Above eye level?	> 6 hours	?5 years	None at all	No		No	Fluorescent light	I adjust computer brightness	No	No	Yes	TRUE	TRUE	TRUE	TRUE	TRUE	TRUE	FALSE	TRUE	Yes	8	Yes	8	No	0	No	0	Yes	8	Yes	7	Yes	8	No	0	No	0	No	0	Yes	Take breaks, Use eye drops
Female	33-38	East Indian	Couva	Urban	CAPE level	Appropriate	Cellular Phone	At eye level?	≤ 6 hours	< 5 Years	None at all	No		No	Fluorescent light	No i do Not adjust the computer's brightness	No	No	No	TRUE	TRUE	FALSE	FALSE	TRUE	TRUE	FALSE	FALSE	No	0	No	0	Yes	2	No	0	Yes	2	Yes	2	No	0	Yes	3	No	0	No	0	No
Male	33-38	Asian	Aranguez	Sub urban	CAPE level	Not appropriate	Desktops	Above eye level?	> 6 hours	≥ 5 Years	None at all	Yes	Anti reflective coating?	Yes	Fluorescent light	I adjust computer brightness	No	No	No	FALSE	TRUE	TRUE	TRUE	TRUE	TRUE	TRUE	FALSE	No	0	Yes	7	Yes	7	Yes	9	Yes	8	Yes	7	No	0	No	0	No	0	No	0	Yes	Take breaks
Female	48-53	Mixed	Aranguez	Urban	Bachelor’s degree	Appropriate	Desktops	Above eye level?	> 6 hours	≥ 5 Years	≤ 20 minutes	Yes	Anti reflective coating?	Yes	Fluorescent light	No i do Not adjust the computer's brightness	Yes	Yes	No	TRUE	TRUE	TRUE	TRUE	TRUE	TRUE	FALSE	FALSE	Yes	3	No	0	No	0	Yes	2	Yes	4	Yes	2	Yes	1	Yes	3	No	0	Yes	2	Yes	Take breaks, Drink water
Male	23-28	East Indian	Rio Claro	Rural	CAPE level	Appropriate	Desktops	Above eye level?	> 6 hours	< 5 Years	≤ 20 minutes	No		No	Fluorescent light	No i do Not adjust the computer's brightness	Yes	No	No	TRUE	TRUE	TRUE	TRUE	TRUE	TRUE	FALSE	FALSE	Yes	2	Yes	2	Yes	4	Yes	2	Yes	3	Yes	3	Yes	3	Yes	2	No	0	No	0	Yes	Take breaks
Male	33-38	East Indian	Couva	Rural	CAPE level	Appropriate	Desktops	Below eye level?	> 6 hours	≥ 5 Years	≤ 20 minutes	No		No	Fluorescent light	No i do Not adjust the computer's brightness	Yes	No	Yes	TRUE	TRUE	TRUE	TRUE	TRUE	TRUE	FALSE	FALSE	Yes	8	Yes	7	No	5	Yes	7	Yes	7	Yes	8	Yes	8	Yes	8	No	0	No	0	Yes	Take breaks, Use eye drops
Female	48-53	East Indian	Couva	Urban	Bachelor’s degree	Appropriate	Laptop	Above eye level?	> 6 hours	< 5 Years	None at all	No		Yes	Fluorescent light	No i do Not adjust the computer's brightness	No	No	No	TRUE	TRUE	TRUE	TRUE	TRUE	TRUE	TRUE	FALSE	No	0	No	0	Yes	2	Yes	6	No	0	Yes	2	Yes	3	Yes	2	No	0	No	0	No
Male	33-38	African	Aranguez	Urban	CAPE level	Not appropriate	Desktops	Above eye level?	> 6 hours	< 5 Years	≤ 20 minutes	No		Yes	Fluorescent light	I adjust computer brightness	No	No	Yes	TRUE	TRUE	TRUE	TRUE	TRUE	TRUE	FALSE	FALSE	No	0	No	0	No	0	Yes	3	Yes	3	Yes	2	No	0	No	0	No	0	No	0	No
Female	38-43	East Indian	Port Of spain	Urban	Bachelor’s degree	Not appropriate	Desktops	Above eye level?	> 6 hours	≥ 5 Years	None at all	Yes	Blue light blockers?	Yes	Natural light	I adjust computer brightness	Yes	Yes	No	TRUE	TRUE	TRUE	TRUE	TRUE	TRUE	TRUE	FALSE	Yes	7	Yes	8	Yes	4	Yes	5	Yes	6	Yes	6	Yes	6	No	0	No	0	No	0	No
Male	28-33	Asian	Aranguez	Urban	CAPE level	Appropriate	Desktops	Above eye level?	> 6 hours	≥ 5 Years	≤ 20 minutes	No		Yes	Fluorescent light	I adjust computer brightness	Yes	No	No	TRUE	TRUE	TRUE	TRUE	TRUE	TRUE	FALSE	FALSE	Yes	5	Yes	3	Yes	3	Yes	4	No	0	Yes	4	Yes	3	Yes	3	Yes	3	Yes	3	Yes	Use eye drops
Male	43-48	African	Aranguez	Rural	CAPE level	Not appropriate	Laptop	At eye level?	> 6 hours	≥ 5 Years	≤ 20 minutes	Yes	Blue light blockers?	Yes	Natural light	I adjust computer brightness	No	No	No	TRUE	TRUE	TRUE	TRUE	TRUE	TRUE	FALSE	FALSE	No	0	No	0	Yes	2	No	0	No	0	No	0	Yes	4	Yes	4	No	0	No	0	Yes	Take breaks, Drink water, Other
Male	33-38	East Indian	Port Of spain	Rural	CAPE level	Appropriate	Desktops	At eye level?	> 6 hours	≥ 5 Years	>20 minutes	Yes	Anti reflective coating?	Yes	Fluorescent light	I adjust computer brightness	No	Yes	No	TRUE	TRUE	TRUE	TRUE	TRUE	TRUE	TRUE	TRUE	No	0	Yes	3	Yes	5	No	0	Yes	7	No	0	No	0	No	0	Yes	4	No	0	Yes	Take breaks, Visit optometrist/opthalmologist, Obtain Specacles
Male	43-48	East Indian	Aranguez	Rural	CSEC level	Appropriate	Desktops	Below eye level?	≤ 6 hours	< 5 Years	None at all	No		Yes	Natural light	I adjust computer brightness	No	No	No	TRUE	TRUE	TRUE	TRUE	TRUE	TRUE	TRUE	FALSE	Yes	2	No	0	No	0	No	0	No	0	Yes	1	No	0	No	0	Yes	2	No	0	No
Female	33-38	East Indian	Rio Claro	Rural	Master’s degree	Appropriate	Desktops	At eye level?	> 6 hours	≥ 5 Years	None at all	Yes	Anti reflective coating?	Yes	Fluorescent light	No i do Not adjust the computer's brightness	Yes	Yes	No	TRUE	TRUE	FALSE	TRUE	TRUE	TRUE	FALSE	FALSE	Yes	5	Yes	10	Yes	6	Yes	10	Yes	10	Yes	10	Yes	10	Yes	10	Yes	10	No	0	Yes	Take breaks, Drink water, Use eye drops, Visit optometrist/opthalmologist, Obtain Specacles
Male	58-63	African	Port Of spain	Urban	Bachelor’s degree	Appropriate	Laptop	Above eye level?	> 6 hours	≥ 5 Years	None at all	No	Anti reflective coating?	No	Fluorescent light	I adjust computer brightness	Yes	No	Yes	TRUE	TRUE	TRUE	TRUE	TRUE	TRUE	TRUE	TRUE	No	0	Yes	4	Yes	0	Yes	3	Yes	5	Yes	5	Yes	6	Yes	7	No	0	No	0	No
Female	53-58	East Indian	Aranguez	Urban	CAPE level	Appropriate	Desktops	Above eye level?	≤ 6 hours	≥ 5 Years	≤ 20 minutes	Yes	Blue light blockers?	No	Fluorescent light	I adjust computer brightness	Yes	Yes	No	TRUE	TRUE	TRUE	TRUE	TRUE	TRUE	TRUE	FALSE	No	0	No	0	No	0	No	0	Yes	2	No	0	Yes	3	Yes	5	No	0	No	0	Yes	Take breaks, Use eye drops
Male	33-38	Asian	San Juan	Urban	CAPE level	Not appropriate	Desktops	Above eye level?	> 6 hours	≥ 5 Years	None at all	Yes	Anti reflective coating?	Yes	Fluorescent light	No i do Not adjust the computer's brightness	No	Yes	No	TRUE	TRUE	TRUE	TRUE	TRUE	TRUE	TRUE	TRUE	No	0	Yes	4	No	0	No	0	No	0	No	0	No	0	No	0	Yes	5	No	0	Yes	Visit optometrist/opthalmologist, Obtain Specacles
Male	28-33	East Indian	Aranguez	Urban	CAPE level	Appropriate	Desktops	Above eye level?	≤ 6 hours	< 5 Years	None at all	No		Yes	Fluorescent light	I adjust computer brightness	No	No	No	TRUE	TRUE	TRUE	TRUE	TRUE	TRUE	FALSE	FALSE	No	0	Yes	2	No	0	Yes	4	Yes	6	No	0	Yes	4	No	0	No	0	No	0	No
Female	48-53	East Indian	Tunapuna	Urban	CAPE level	Appropriate	Desktops	Above eye level?	> 6 hours	≥ 5 Years	None at all	No	Blue light blockers?	Yes	Fluorescent light	I adjust computer brightness	Yes	No	Yes	TRUE	TRUE	TRUE	TRUE	TRUE	TRUE	TRUE	TRUE	Yes	7	Yes	6	Yes	4	Yes	3	Yes	8	Yes	6	No	0	No	0	No	0	No	0	No
Male	23-28	African	Rio Claro	Rural	Bachelor’s degree	Not appropriate	Desktops	Above eye level?	> 6 hours	< 5 Years	≤ 20 minutes	Yes	Blue light blockers?	Yes	Fluorescent light	No i do Not adjust the computer's brightness	Yes	No	No	TRUE	TRUE	TRUE	TRUE	TRUE	TRUE	FALSE	FALSE	Yes	8	Yes	6	Yes	2	Yes	4	Yes	5	Yes	7	Yes	3	Yes	6	Yes	2	No	0	No
Male	33-38	East Indian	Tunapuna	Rural	Bachelor’s degree	Appropriate	Desktops	Below eye level?	> 6 hours	≥ 5 Years	≤ 20 minutes	No		No	Fluorescent light	I adjust computer brightness	No	No	Yes	TRUE	TRUE	TRUE	TRUE	TRUE	TRUE	FALSE	FALSE	No	0	No	0	Yes	5	Yes	4	No	0	Yes	6	Yes	7	No	0	Yes	7	No	0	Yes	Take breaks
Female	43-48	East Indian	Aranguez	Urban	Bachelor’s degree	Not appropriate	Desktops	Above eye level?	> 6 hours	≥ 5 Years	≤ 20 minutes	Yes	Blue light blockers?	No	Fluorescent light	I adjust computer brightness	No	No	No	TRUE	TRUE	TRUE	TRUE	TRUE	TRUE	TRUE	FALSE	No	0	No	0	Yes	4	Yes	6	No	0	Yes	3	Yes	4	Yes	3	No	0	No	0	Yes	Drink water, Visit optometrist/opthalmologist
Female	38-43	East Indian	Aranguez	Urban	Bachelor’s degree	Not appropriate	Laptop	At eye level?	> 6 hours	≥ 5 Years	≤ 20 minutes	Yes	Blue light blockers?	Yes	Fluorescent light	I adjust computer brightness	No	No	No	TRUE	TRUE	TRUE	TRUE	TRUE	TRUE	FALSE	FALSE	Yes	3	No	0	No	0	Yes	3	No	0	Yes	5	Yes	4	Yes	2	No	0	No	0	Yes	Take breaks, Obtain Specacles
Female	18-23	Mixed	Aranguez	Rural	CAPE level	Appropriate	Desktops	At eye level?	≤ 6 hours	< 5 Years	None at all	No		Yes	Natural light	No i do Not adjust the computer's brightness	No	No	No	TRUE	TRUE	TRUE	TRUE	TRUE	TRUE	FALSE	FALSE	No	0	No	0	No	0	Yes	3	No	0	No	0	Yes	6	Yes	4	No	0	No	0	No
Female	23-28	African	Aranguez	Urban	CAPE level	Appropriate	Cellular Phone	Above eye level?	≤ 6 hours	< 5 Years	≤ 20 minutes	Yes	Blue light blockers?	Yes	Fluorescent light	I adjust computer brightness	No	No	No	TRUE	TRUE	TRUE	TRUE	TRUE	TRUE	FALSE	FALSE	No	0	No	0	Yes	3	No	0	No	0	Yes	4	Yes	9	Yes	8	No	0	No	0	Yes	Take breaks, Obtain Specacles
Female	28-33	African	Aranguez	Urban	CAPE level	Appropriate	Desktops	At eye level?	≤ 6 hours	< 5 Years	None at all	No		Yes	Natural light	I adjust computer brightness	Yes	No	No	TRUE	TRUE	TRUE	FALSE	TRUE	TRUE	FALSE	FALSE	No	0	No	0	No	0	Yes	3	Yes	3	Yes	4	Yes	3	Yes	5	No	0	No	0	Yes	Take breaks
Male	33-38	African	Chaguanas	Urban	Bachelor’s degree	Appropriate	Desktops	Below eye level?	> 6 hours	≥ 5 Years	None at all	Yes	Anti reflective coating?	Yes	Fluorescent light	No i do Not adjust the computer's brightness	Yes	Yes	Yes	TRUE	TRUE	TRUE	TRUE	TRUE	TRUE	TRUE	TRUE	No	0	No	0	No	0	Yes	5	Yes	7	No	0	No	0	No	0	No	0	No	0	No
Male	43-48	East Indian	San Fernando	Rural	CAPE level	Appropriate	Desktops	Above eye level?	> 6 hours	≥ 5 Years	None at all	Yes	Anti reflective coating?	Yes	Natural light	No i do Not adjust the computer's brightness	Yes	Yes	No	TRUE	TRUE	TRUE	TRUE	TRUE	TRUE	TRUE	FALSE	Yes	6	Yes	5	Yes	7	Yes	7	No	0	No	0	No	0	No	0	No	0	No	0	Yes	Obtain Specacles
Male	43-48	African	Mayaro	Rural	CAPE level	Appropriate	Laptop	At eye level?	> 6 hours	≥ 5 Years	>20 minutes	No		No	Fluorescent light	I adjust computer brightness	No	No	No	TRUE	TRUE	TRUE	TRUE	TRUE	TRUE	TRUE	TRUE	No	0	Yes	6	Yes	7	Yes	7	No	0	No	0	No	0	No	0	No	0	No	0	Yes	Take breaks, Drink water, Use eye drops
Male	23-28	East Indian	Cunupia	Urban	Bachelor’s degree	Appropriate	Desktops	Below eye level?	> 6 hours	≥ 5 Years	≤ 20 minutes	No		No	Fluorescent light	No i do Not adjust the computer's brightness	No	No	No	TRUE	TRUE	TRUE	FALSE	TRUE	TRUE	FALSE	FALSE	Yes	6	Yes	7	Yes	4	Yes	7	Yes	8	Yes	8	No	0	No	0	No	0	No	0	No
Male	38-43	Caucasian	Tunapuna	Urban	CAPE level	Appropriate	Desktops	At eye level?	> 6 hours	≥ 5 Years	None at all	No		No	Fluorescent light	I adjust computer brightness	Yes	No	No	TRUE	TRUE	TRUE	TRUE	TRUE	TRUE	FALSE	TRUE	Yes	7	Yes	7	Yes	5	Yes	5	Yes	9	Yes	7	No	0	No	0	No	0	No	0	No
Male	38-43	African	Aranguez	Agriculture land in urban area	Bachelor’s degree	Appropriate	Laptop	Above eye level?	> 6 hours	≥ 5 Years	≤ 20 minutes	Yes	Anti reflective coating?	Yes	Fluorescent light	I adjust computer brightness	Yes	Yes	Yes	TRUE	TRUE	TRUE	TRUE	TRUE	TRUE	TRUE	TRUE	Yes	5	Yes	4	Yes	4	Yes	7	Yes	7	No	0	No	0	No	0	No	0	No	0	Yes	Visit optometrist/opthalmologist, Obtain Specacles
Male	43-48	African	Tunapuna	Urban	Bachelor’s degree	Appropriate	Desktops	Above eye level?	> 6 hours	≥ 5 Years	None at all	Yes	Anti reflective coating?	Yes	Natural light	I adjust computer brightness	No	Yes	No	TRUE	TRUE	TRUE	TRUE	TRUE	TRUE	TRUE	FALSE	Yes	6	No	0	No	0	No	0	Yes	8	Yes	5	No	0	No	0	No	0	No	0	Yes	Use eye drops, Visit optometrist/opthalmologist, Obtain Specacles
Female	43-48	East Indian	San Fernando	Urban	Bachelor’s degree	Appropriate	Desktops	Above eye level?	> 6 hours	≥ 5 Years	None at all	Yes	Anti reflective coating?	Yes	Fluorescent light	No i do Not adjust the computer's brightness	Yes	Yes	Yes	TRUE	TRUE	TRUE	TRUE	TRUE	TRUE	FALSE	TRUE	No	0	No	0	No	0	No	0	No	0	No	0	No	0	No	0	Yes	6	No	0	Yes	Visit optometrist/opthalmologist, Obtain Specacles
Male	48-53	African	Port Of spain	Urban	CAPE level	Appropriate	Desktops	Above eye level?	> 6 hours	≥ 5 Years	≤ 20 minutes	No		No	Fluorescent light	No i do Not adjust the computer's brightness	No	No	Yes	TRUE	TRUE	TRUE	TRUE	TRUE	TRUE	TRUE	FALSE	No	0	No	0	Yes	7	Yes	8	Yes	8	Yes	6	No	0	No	0	No	0	No	0	Yes	Obtain Specacles
Male	33-38	African	Rio Claro	Rural	CAPE level	Appropriate	Desktops	At eye level?	> 6 hours	≥ 5 Years	≤ 20 minutes	No		No	Fluorescent light	No i do Not adjust the computer's brightness	Yes	No	No	TRUE	TRUE	TRUE	TRUE	TRUE	TRUE	FALSE	FALSE	Yes	6	Yes	5	No	0	Yes	6	Yes	9	Yes	7	Yes	7	Yes	8	No	0	No	0	No
Male	43-48	African	Tunapuna	Urban	Bachelor’s degree	Appropriate	Desktops	Above eye level?	> 6 hours	≥ 5 Years	None at all	Yes	Anti reflective coating?	Yes	Fluorescent light	I adjust computer brightness	No	Yes	No	TRUE	TRUE	TRUE	TRUE	TRUE	TRUE	FALSE	FALSE	Yes	8	Yes	7	Yes	8	Yes	8	Yes	8	Yes	6	No	0	No	0	No	0	No	0	Yes	Take breaks, Drink water
Male	43-48	East Indian	Aranguez	Urban	CAPE level	Appropriate	Desktops	Above eye level?	> 6 hours	≥ 5 Years	None at all	No		No	Fluorescent light	I adjust computer brightness	No	No	Yes	TRUE	TRUE	TRUE	TRUE	TRUE	TRUE	TRUE	TRUE	Yes	6	Yes	8	Yes	6	Yes	5	Yes	8	Yes	7	No	0	No	0	No	1	No	0	No
Male	38-43	African	Tunapuna	Urban	Bachelor’s degree	Appropriate	Desktops	Above eye level?	> 6 hours	≥ 5 Years	None at all	Yes		Yes	Fluorescent light	No i do Not adjust the computer's brightness	Yes	No	No	TRUE	TRUE	TRUE	TRUE	TRUE	TRUE	TRUE	TRUE	Yes	7	No	0	Yes	6	Yes	7	No	0	Yes	7	No	0	Yes	7	Yes	4	No	0	Yes	Obtain Specacles
Male	43-48	Caucasian	San Fernando	Urban	CAPE level	Appropriate	Desktops	Above eye level?	> 6 hours	≥ 5 Years	>20 minutes	Yes	Anti reflective coating?	Yes	Fluorescent light	I adjust computer brightness	No	Yes	No	TRUE	TRUE	TRUE	TRUE	TRUE	TRUE	FALSE	TRUE	Yes	7	No	0	No	0	No	0	No	0	No	0	No	0	No	0	No	0	No	0	Yes	Visit optometrist/opthalmologist, Obtain Specacles
Female	23-28	African	Aranguez	Suburban	CAPE level	Appropriate	Desktops	Above eye level?	> 6 hours	≥ 5 Years	None at all	Yes	Anti reflective coating?	No	Fluorescent light	No i do Not adjust the computer's brightness	No	Yes	Yes	TRUE	TRUE	TRUE	TRUE	TRUE	TRUE	TRUE	FALSE	No	0	Yes	4	Yes	5	Yes	6	Yes	7	Yes	7	No	0	No	0	No	0	No	0	Yes	Obtain Specacles
Male	28-33	East Indian	Aranguez	Urban	CAPE level	Appropriate	Desktops	Above eye level?	> 6 hours	≥ 5 Years	≤ 20 minutes	No		No	Fluorescent light	I adjust computer brightness	No	No	No	TRUE	TRUE	TRUE	TRUE	TRUE	TRUE	FALSE	TRUE	Yes	7	Yes	5	Yes	5	Yes	8	Yes	7	No	0	No	0	No	0	No	0	No	0	No
Female	33-38	African	Cunupia	Urban	Bachelor’s degree	Appropriate	Laptop	Above eye level?	> 6 hours	≥ 5 Years	None at all	Yes	Anti reflective coating?	Yes	Fluorescent light	No i do Not adjust the computer's brightness	No	Yes	No	TRUE	TRUE	TRUE	TRUE	TRUE	TRUE	TRUE	TRUE	Yes	8	No	0	Yes	6	Yes	6	No	0	No	0	No	0	No	0	No	0	No	0	Yes	Take breaks, Obtain Specacles
Male	28-33	African	Tunapuna	Urban	Bachelor’s degree	Appropriate	Desktops	Above eye level?	> 6 hours	≥ 5 Years	None at all	Yes	Anti reflective coating?	Yes	Fluorescent light	I adjust computer brightness	Yes	Yes	No	TRUE	TRUE	TRUE	TRUE	TRUE	TRUE	TRUE	TRUE	Yes	7	Yes	8	Yes	8	Yes	7	Yes	8	No	0	No	0	No	0	No	0	No	0	No
Male	38-43	East Indian	San Juan	Urban	CAPE level	Appropriate	Desktops	Above eye level?	> 6 hours	≥ 5 Years	None at all	Yes	Anti reflective coating?	Yes	Fluorescent light	No i do Not adjust the computer's brightness	No	Yes	No	TRUE	TRUE	TRUE	FALSE	TRUE	TRUE	TRUE	TRUE	No	0	No	0	No	0	Yes	6	Yes	7	Yes	6	Yes	5	No	0	No	0	No	0	No
Female	33-38	East Indian	Aranguez	Urban	Bachelor’s degree	Appropriate	Desktops	Above eye level?	> 6 hours	≥ 5 Years	None at all	No		No	Fluorescent light	No i do Not adjust the computer's brightness	Yes	No	No	TRUE	TRUE	TRUE	TRUE	TRUE	FALSE	TRUE	FALSE	Yes	6	Yes	5	Yes	6	Yes	4	Yes	7	No	0	No	0	No	0	No	0	No	0	Yes	Use eye drops
Male	43-48	East Indian	Aranguez	Urban	CAPE level	Appropriate	Desktops	Below eye level?	> 6 hours	≥ 5 Years	None at all	Yes	Anti reflective coating?	Yes	Fluorescent light	I adjust computer brightness	Yes	Yes	No	TRUE	TRUE	TRUE	TRUE	TRUE	TRUE	TRUE	TRUE	No	0	No	0	No	0	Yes	7	Yes	8	No	0	No	0	No	0	No	0	No	0	No
Male	38-43	East Indian	Port Of Spain	Urban	Bachelor’s degree	Appropriate	Desktops	At eye level?	> 6 hours	≥ 5 Years	None at all	Yes	Anti reflective coating?	No	Natural light	I adjust computer brightness	No	Yes	No	TRUE	TRUE	TRUE	TRUE	TRUE	TRUE	TRUE	TRUE	Yes	0	No	0	No	0	No	0	No	0	No	0	No	0	No	0	No	0	No	0	No
Female	38-43	African	Aranguez	Urban	CAPE level	Appropriate	Desktops	Below eye level?	> 6 hours	≥ 5 Years	None at all	No		No	Fluorescent light	I adjust computer brightness	Yes	No	No	TRUE	TRUE	TRUE	TRUE	TRUE	TRUE	FALSE	TRUE	Yes	7	Yes	6	Yes	5	Yes	8	Yes	7	No	0	No	0	No	0	No	0	No	0	No
Male	38-43	East Indian	Rio Claro	Rural	Bachelor’s degree	Appropriate	Desktops	Above eye level?	> 6 hours	≥ 5 Years	None at all	Yes	Blue light blockers?	Yes	Fluorescent light	No i do Not adjust the computer's brightness	No	No	No	TRUE	TRUE	TRUE	TRUE	TRUE	TRUE	TRUE	FALSE	Yes	4	Yes	3	Yes	7	Yes	8	No	0	No	0	No	0	No	0	No	0	No	0	Yes	Visit optometrist/opthalmologist, Obtain Specacles
Male	53-58	East Indian	San Fernando	Urban	CAPE level	Appropriate	Desktops	Above eye level?	> 6 hours	≥ 5 Years	None at all	Yes	Anti reflective coating?	Yes	Fluorescent light	I adjust computer brightness	No	Yes	No	TRUE	TRUE	TRUE	TRUE	TRUE	TRUE	FALSE	TRUE	Yes	5	Yes	5	No	0	Yes	7	Yes	8	No	0	Yes	6	No	0	No	0	No	0	Yes	Obtain Specacles
Male	43-48	East Indian	Rio Claro	Urban	CAPE level	Appropriate	Desktops	Above eye level?	> 6 hours	≥ 5 Years	≤ 20 minutes	Yes	Anti reflective coating?	Yes	Fluorescent light	I adjust computer brightness	Yes	Yes	No	FALSE	TRUE	TRUE	TRUE	TRUE	TRUE	FALSE	FALSE	Yes	0	Yes	2	No	0	No	7	Yes	8	No	0	Yes	3	No	0	No	0	No	0	Yes	Use eye drops, Visit optometrist/opthalmologist
Male	38-43	East Indian	Rio Claro	Rural	Bachelor’s degree	Appropriate	Desktops	Above eye level?	≤ 6 hours	≥ 5 Years	≤ 20 minutes	Yes	Blue light blockers?	Yes	Fluorescent light	I adjust computer brightness	No	Yes	No	TRUE	TRUE	TRUE	TRUE	TRUE	TRUE	FALSE	FALSE	No	0	No	0	No	0	Yes	7	Yes	7	No	0	Yes	6	Yes	7	No	0	No	0	Yes	Visit optometrist/opthalmologist, Obtain Specacles
Male	43-48	East Indian	Cunupia	developed rural	CAPE level	Not appropriate	Desktops	Below eye level?	> 6 hours	≥ 5 Years	>20 minutes	Yes	Anti reflective coating?	Yes	Fluorescent light	No i do Not adjust the computer's brightness	Yes	No	No	TRUE	TRUE	TRUE	TRUE	TRUE	TRUE	TRUE	FALSE	Yes	5	No	0	No	0	Yes	3	No	0	Yes	3	Yes	2	No	0	No	0	No	0	Yes	Use eye drops, Visit optometrist/opthalmologist, Obtain Specacles
Male	28-33	African	Aranguez	Urban	CAPE level	Appropriate	Desktops	Above eye level?	> 6 hours	≥ 5 Years	None at all	Yes	Anti reflective coating?	Yes	Fluorescent light	I adjust computer brightness	Yes	Yes	No	TRUE	TRUE	TRUE	TRUE	TRUE	TRUE	FALSE	FALSE	Yes	7	No	0	No	0	Yes	3	Yes	6	No	0	No	0	No	0	No	0	No	0	Yes	Use eye drops, Obtain Specacles
Female	33-38	Asian	Aranguez	Urban	CAPE level	Appropriate	Desktops	Above eye level?	> 6 hours	≥ 5 Years	≤ 20 minutes	No		Yes	Fluorescent light	No i do Not adjust the computer's brightness	No	No	No	TRUE	TRUE	TRUE	TRUE	TRUE	TRUE	FALSE	TRUE	Yes	4	Yes	7	No	0	No	0	No	0	No	0	No	0	No	0	No	0	No	0	No
Male	33-38	East Indian	Rio Claro	Rural	CAPE level	Appropriate	Desktops	Above eye level?	> 6 hours	≥ 5 Years	≤ 20 minutes	Yes	Anti reflective coating?	Yes	Fluorescent light	No i do Not adjust the computer's brightness	Yes	Yes	No	TRUE	TRUE	TRUE	TRUE	TRUE	TRUE	FALSE	FALSE	Yes	7	Yes	4	No	0	No	0	No	0	No	0	No	0	No	0	No	0	No	0	No
Male	33-38	Asian	Mayaro	Rural	Bachelor’s degree	Appropriate	Desktops	Above eye level?	≤ 6 hours	≥ 5 Years	≤ 20 minutes	No	Anti reflective coating?	No	Fluorescent light	I adjust computer brightness	Yes	No	No	TRUE	TRUE	TRUE	TRUE	TRUE	TRUE	FALSE	FALSE	No	0	Yes	5	No	0	No	0	No	0	No	0	No	0	No	0	No	0	No	0	No
Male	33-38	African	Tunapuna	Urban	Bachelor’s degree	Appropriate	Desktops	Above eye level?	≤ 6 hours	≥ 5 Years	None at all	No	Anti reflective coating?	No	Fluorescent light	I adjust computer brightness	No	No	No	TRUE	TRUE	TRUE	TRUE	TRUE	TRUE	FALSE	FALSE	No	0	No	0	No	0	No	0	Yes	7	No	0	No	0	Yes	7	No	0	No	0	Yes	Take breaks
Female	33-38	East Indian	San Juan	Rural	CAPE level	Appropriate	Desktops	Above eye level?	≤ 6 hours	≥ 5 Years	≤ 20 minutes	No	Anti reflective coating?	No	Fluorescent light	I adjust computer brightness	No	No	No	TRUE	TRUE	TRUE	TRUE	TRUE	TRUE	FALSE	FALSE	No	0	No	0	No	0	No	0	Yes	7	No	0	No	0	No	0	No	0	No	0	No
Female	38-43	African	Cunupia	Urban	CAPE level	Appropriate	Desktops	Below eye level?	≤ 6 hours	≥ 5 Years	>20 minutes	Yes	Anti reflective coating?	Yes	Fluorescent light	No i do Not adjust the computer's brightness	Yes	Yes	No	TRUE	TRUE	TRUE	TRUE	TRUE	TRUE	FALSE	TRUE	No	0	Yes	5	No	0	No	0	Yes	6	No	0	Yes	7	Yes	5	No	0	No	0	No
Female	33-38	East Indian	Aranguez	Urban	CAPE level	Appropriate	Desktops	Above eye level?	> 6 hours	≥ 5 Years	≤ 20 minutes	Yes	Anti reflective coating?	Yes	Fluorescent light	I adjust computer brightness	No	Yes	No	TRUE	TRUE	TRUE	TRUE	TRUE	TRUE	FALSE	FALSE	No	0	No	0	No	0	Yes	6	Yes	5	No	0	Yes	5	No	0	No	0	No	0	Yes	Visit optometrist/opthalmologist
Female	38-43	East Indian	Cunupia	Urban	CAPE level	Appropriate	Desktops	Above eye level?	> 6 hours	≥ 5 Years	>20 minutes	Yes	Anti reflective coating?	Yes	Fluorescent light	No i do Not adjust the computer's brightness	Yes	Yes	No	TRUE	TRUE	TRUE	TRUE	TRUE	TRUE	FALSE	TRUE	No	0	No	0	No	0	Yes	6	No	0	No	0	No	0	No	0	No	0	No	0	Yes	Use eye drops, Visit optometrist/opthalmologist
Female	18-23	East Indian	San Fernando	Urban	CAPE level	Appropriate	Laptop	Below eye level?	≤ 6 hours	≥ 5 Years	≤ 20 minutes	Yes	Anti reflective coating?	No	Fluorescent light	I adjust computer brightness	Yes	Yes	No	TRUE	TRUE	TRUE	TRUE	TRUE	TRUE	FALSE	FALSE	Yes	6	No	0	No	0	Yes	5	Yes	4	Yes	0	No	0	No	0	No	0	No	0	Yes	Take breaks
Female	23-28	East Indian	Couva	Rural	CAPE level	Not appropriate	Desktops	At eye level?	> 6 hours	< 5 Years	≤ 20 minutes	No		Yes	Fluorescent light	No i do Not adjust the computer's brightness	Yes	No	No	TRUE	TRUE	FALSE	TRUE	TRUE	TRUE	FALSE	FALSE	Yes	8	No	0	Yes	6	Yes	7	No	0	Yes	8	No	0	Yes	3	Yes	6	No	0	No
Male	38-43	African	San Fernando	Urban	CAPE level	Not appropriate	Desktops	Below eye level?	> 6 hours	≥ 5 Years	>20 minutes	Yes	Anti reflective coating?	No	Natural light	No i do Not adjust the computer's brightness	Yes	Yes	No	TRUE	TRUE	TRUE	TRUE	TRUE	TRUE	FALSE	FALSE	Yes	4	No	0	Yes	4	Yes	6	Yes	9	Yes	8	Yes	3	Yes	5	No	0	No	0	Yes	Take breaks, Use eye drops, Visit optometrist/opthalmologist, Obtain Specacles
Male	18-23	Afro- Indian	Aranguez	Urban	CSEC level	Appropriate	Desktops	Above eye level?	≤ 6 hours	< 5 Years	≤ 20 minutes	No		Yes	Natural light	I adjust computer brightness	No	No	No	TRUE	TRUE	TRUE	TRUE	TRUE	TRUE	FALSE	FALSE	No	0	No	0	No	0	No	0	No	0	No	0	Yes	2	No	0	No	0	No	0	No
Male	53-58	African	Aranguez	Urban	Bachelor’s degree	Not appropriate	Desktops	Below eye level?	≤ 6 hours	< 5 Years	≤ 20 minutes	Yes	Anti reflective coating?	Yes	Fluorescent light	No i do Not adjust the computer's brightness	No	No	Yes	TRUE	TRUE	TRUE	TRUE	TRUE	TRUE	FALSE	FALSE	Yes	5	No	0	No	0	No	0	No	0	Yes	8	Yes	4	No	0	Yes	3	No	0	No
Female	33-38	East Indian	First citizens	Urban	Bachelor’s degree	Not appropriate	Desktops	Below eye level?	> 6 hours	≥ 5 Years	≤ 20 minutes	No		Yes	Natural light	I adjust computer brightness	Yes	No	No	TRUE	TRUE	TRUE	TRUE	TRUE	TRUE	FALSE	FALSE	No	0	No	0	No	0	No	0	Yes	3	Yes	2	No	0	No	0	No	0	No	0	No
Female	43-48	African	Aranguez	Both	Bachelor’s degree	Appropriate	Desktops	At eye level?	> 6 hours	≥ 5 Years	≤ 20 minutes	Yes	Anti reflective coating?	Yes	Fluorescent light	No i do Not adjust the computer's brightness	No	Yes	No	TRUE	TRUE	TRUE	TRUE	TRUE	TRUE	FALSE	FALSE	No	0	No	0	Yes	3	Yes	2	No	0	Yes	3	Yes	2	No	0	No	0	No	0	Yes	Take breaks, Drink water, Obtain Specacles
Male	48-53	Mixed	Aranguez	Urban	Bachelor’s degree	Appropriate	Desktops	At eye level?	≤ 6 hours	≥ 5 Years	≤ 20 minutes	No		No	Fluorescent light	No i do Not adjust the computer's brightness	No	No	No	TRUE	TRUE	TRUE	TRUE	TRUE	TRUE	FALSE	FALSE	No	0	No	0	Yes	3	No	0	No	0	No	0	Yes	5	No	0	No	0	No	0	No
Male	23-28	East Indian	Aranguez	Both semi rural	CAPE level	Appropriate	Desktops	Above eye level?	> 6 hours	≥ 5 Years	≤ 20 minutes	No	Blue light blockers?	Yes	Fluorescent light	I adjust computer brightness	No	No	No	TRUE	TRUE	TRUE	TRUE	TRUE	TRUE	FALSE	FALSE	Yes	4	Yes	0	No	0	No	0	No	0	Yes	4	No	0	No	0	No	0	No	0	Yes	Take breaks, Drink water
Male	18-23	East Indian	Aranguez	Urban	CSEC level	Not appropriate	Cellular Phone	Below eye level?	≤ 6 hours	< 5 Years	None at all	No		No	Fluorescent light	No i do Not adjust the computer's brightness	No	No	No	TRUE	TRUE	TRUE	TRUE	TRUE	TRUE	FALSE	FALSE	No	0	No	0	No	0	No	0	No	0	No	0	No	0	No	0	No	0	No	0	No
Female	43-48	African	Aranguez	Rural	CAPE level	Appropriate	Desktops	Above eye level?	> 6 hours	≥ 5 Years	None at all	Yes	Anti reflective coating?	No	Fluorescent light	I adjust computer brightness	No	Yes	No	TRUE	TRUE	TRUE	TRUE	TRUE	TRUE	FALSE	FALSE	No	0	Yes	3	No	0	No	0	Yes	5	No	0	No	0	No	0	No	0	No	0	Yes	Use eye drops, Visit optometrist/opthalmologist
Female	43-48	African	Grand Bazaar	Rural	Bachelor’s degree	Not appropriate	Desktops	Above eye level?	> 6 hours	≥ 5 Years	≤ 20 minutes	Yes	Anti reflective coating?	No	Fluorescent light	No i do Not adjust the computer's brightness	No	Yes	No	TRUE	TRUE	TRUE	TRUE	TRUE	TRUE	FALSE	FALSE	No	0	No	0	No	0	Yes	5	Yes	6	No	0	No	0	No	0	No	0	No	0	Yes	Take breaks, Use eye drops, Visit optometrist/opthalmologist
Male	48-53	East Indian	Tunapuna	Urban	CAPE level	Appropriate	Laptop	Above eye level?	> 6 hours	≥ 5 Years	None at all	No		No	Natural light	No i do Not adjust the computer's brightness	No	No	No	TRUE	TRUE	TRUE	TRUE	TRUE	TRUE	FALSE	FALSE	Yes	0	Yes	6	No	0	Yes	6	Yes	7	Yes	4	Yes	5	No	0	No	0	No	0	No
Female	48-53	East Indian	Aranguez	Urban	Bachelor’s degree	Appropriate	Desktops	At eye level?	> 6 hours	≥ 5 Years	≤ 20 minutes	No	Anti reflective coating?	No	Fluorescent light	No i do Not adjust the computer's brightness	No	No	Yes	TRUE	TRUE	TRUE	TRUE	TRUE	TRUE	FALSE	TRUE	Yes	6	Yes	6	No	0	Yes	5	Yes	4	Yes	5	No	0	No	0	No	0	No	0	Yes	Take breaks, Drink water
Female	38-43	African	Rio Claro	Urban	CAPE level	Not appropriate	Desktops	Above eye level?	≤ 6 hours	≥ 5 Years	>20 minutes	Yes	Anti reflective coating?	No	Fluorescent light	I adjust computer brightness	No	Yes	No	TRUE	TRUE	TRUE	TRUE	TRUE	TRUE	FALSE	FALSE	No	0	No	0	Yes	4	Yes	5	No	0	No	0	No	0	No	0	No	0	No	0	Yes	Visit optometrist/opthalmologist, Obtain Specacles
Male	43-48	Hispanic	Cunupia	Rural	CAPE level	Appropriate	Desktops	Above eye level?	> 6 hours	≥ 5 Years	≤ 20 minutes	No		Yes	Fluorescent light	No i do Not adjust the computer's brightness	Yes	No	No	TRUE	TRUE	TRUE	TRUE	TRUE	TRUE	FALSE	FALSE	No	0	No	0	Yes	7	Yes	6	No	0	Yes	6	No	0	No	0	No	0	No	0	No
Female	43-48	Hispanic	Port Of spain	Urban	Bachelor’s degree	Not appropriate	Desktops	Above eye level?	≤ 6 hours	≥ 5 Years	>20 minutes	Yes	Blue light blockers?	No	Fluorescent light	No i do Not adjust the computer's brightness	Yes	No	No	TRUE	TRUE	TRUE	TRUE	TRUE	TRUE	FALSE	FALSE	No	0	Yes	3	No	0	Yes	6	Yes	6	No	0	Yes	5	Yes	4	No	0	No	0	Yes	Obtain Specacles
Male	48-53	East Indian	Aranguez	Urban	Master’s degree	Appropriate	Desktops	Above eye level?	> 6 hours	≥ 5 Years	>20 minutes	Yes	Anti reflective coating?	Yes	Fluorescent light	I adjust computer brightness	No	Yes	No	TRUE	TRUE	TRUE	TRUE	TRUE	TRUE	FALSE	FALSE	No	0	Yes	5	No	0	Yes	5	Yes	4	No	0	Yes	4	Yes	5	No	0	No	0	Yes	Use eye drops, Visit optometrist/opthalmologist
Female	33-38	African	Tunapuna	Urban	Bachelor’s degree	Not appropriate	Desktops	Above eye level?	> 6 hours	≥ 5 Years	≤ 20 minutes	No		No	Fluorescent light	No i do Not adjust the computer's brightness	Yes	No	No	TRUE	TRUE	TRUE	TRUE	TRUE	TRUE	FALSE	TRUE	Yes	4	Yes	6	No	0	Yes	5	No	0	No	0	No	0	No	0	No	0	No	0	No
Female	48-53	East Indian	Tunapuna	Urban	Master’s degree	Appropriate	Desktops	Above eye level?	> 6 hours	≥ 5 Years	≤ 20 minutes	Yes	Anti reflective coating?	Yes	Fluorescent light	No i do Not adjust the computer's brightness	No	Yes	No	TRUE	TRUE	TRUE	TRUE	TRUE	TRUE	FALSE	FALSE	No	0	No	0	No	0	Yes	5	No	0	Yes	7	No	0	No	0	No	0	No	0	Yes	Use eye drops, Visit optometrist/opthalmologist, Obtain Specacles
Male	33-38	East Indian	Rio Claro	Urban	Bachelor’s degree	Appropriate	Desktops	Above eye level?	> 6 hours	≥ 5 Years	None at all	No		No	Fluorescent light	I adjust computer brightness	No	No	Yes	TRUE	TRUE	TRUE	TRUE	TRUE	TRUE	FALSE	FALSE	No	0	Yes	4	No	0	Yes	5	No	0	Yes	7	No	0	No	0	No	0	No	0	Yes	Take breaks, Drink water
Male	23-28	African	Tunapuna	Urban	Bachelor’s degree	Appropriate	Desktops	At eye level?	≤ 6 hours	≥ 5 Years	>20 minutes	No		Yes	Fluorescent light	No i do Not adjust the computer's brightness	No	No	No	TRUE	TRUE	TRUE	TRUE	TRUE	TRUE	FALSE	TRUE	No	0	No	0	No	0	Yes	5	Yes	6	No	0	Yes	5	No	0	No	0	No	0	Yes	Take breaks, Use eye drops
Male	33-38	African	San Fernando	Urban	CAPE level	Appropriate	Desktops	Above eye level?	≤ 6 hours	≥ 5 Years	≤ 20 minutes	Yes	Anti reflective coating?	No	Fluorescent light	No i do Not adjust the computer's brightness	No	Yes	No	TRUE	TRUE	TRUE	TRUE	TRUE	TRUE	FALSE	FALSE	No	0	No	0	No	0	Yes	6	No	0	Yes	7	No	0	No	0	No	0	No	0	Yes	Visit optometrist/opthalmologist, Obtain Specacles
Female	48-53	Hispanic	Aranguez	Urban	CAPE level	Appropriate	Desktops	Above eye level?	> 6 hours	≥ 5 Years	None at all	No		Yes	Fluorescent light	No i do Not adjust the computer's brightness	No	No	No	TRUE	TRUE	TRUE	TRUE	TRUE	TRUE	FALSE	FALSE	No	0	Yes	4	No	0	Yes	7	No	0	Yes	6	Yes	5	No	0	No	0	No	0	No
Female	33-38	East Indian	Rio Claro	Urban	CAPE level	Not appropriate	Desktops	Above eye level?	> 6 hours	≥ 5 Years	≤ 20 minutes	Yes	Anti reflective coating?	Yes	Fluorescent light	I adjust computer brightness	No	No	No	TRUE	TRUE	TRUE	TRUE	TRUE	TRUE	FALSE	FALSE	No	0	No	0	No	0	Yes	5	No	0	Yes	6	No	0	No	0	No	0	No	0	Yes	Visit optometrist/opthalmologist, Obtain Specacles
Female	38-43	East Indian	Cunupia	Residential	Bachelor’s degree	Appropriate	Desktops	At eye level?	> 6 hours	≥ 5 Years	≤ 20 minutes	No		No	Fluorescent light	No i do Not adjust the computer's brightness	No	Yes	Yes	TRUE	TRUE	TRUE	TRUE	TRUE	TRUE	FALSE	FALSE	No	0	No	0	No	0	Yes	5	No	0	Yes	6	No	0	No	0	No	0	No	0	No
Female	43-48	East Indian	Cunupia	Urban	Bachelor’s degree	Not appropriate	Desktops	Above eye level?	> 6 hours	≥ 5 Years	>20 minutes	No		No	Fluorescent light	No i do Not adjust the computer's brightness	No	No	No	TRUE	TRUE	TRUE	TRUE	TRUE	TRUE	FALSE	FALSE	No	0	No	0	No	0	Yes	4	No	0	Yes	8	No	0	No	0	Yes	4	No	0	Yes	Take breaks
Male	33-38	East Indian	Cunupia	Urban	CAPE level	Not appropriate	Desktops	Above eye level?	> 6 hours	≥ 5 Years	None at all	Yes	Anti reflective coating?	Yes	Fluorescent light	I adjust computer brightness	No	Yes	Yes	TRUE	TRUE	TRUE	TRUE	TRUE	TRUE	FALSE	FALSE	No	0	No	0	No	0	No	0	No	0	Yes	7	No	0	No	0	No	0	No	0	Yes	Visit optometrist/opthalmologist, Obtain Specacles
Female	33-38	Asian	Aranguez	Urban	Bachelor’s degree	Appropriate	Cellular Phone	At eye level?	≤ 6 hours	< 5 Years	None at all	No		Yes	Fluorescent light	No i do Not adjust the computer's brightness	No	No	No	TRUE	TRUE	TRUE	TRUE	TRUE	TRUE	FALSE	FALSE	No	0	No	0	No	0	No	0	No	0	No	0	No	0	No	0	No	0	No	0	No
Female	33-38	East Indian	Tunapuna	Urban	Bachelor’s degree	Appropriate	Desktops	Above eye level?	> 6 hours	≥ 5 Years	≤ 20 minutes	No	Anti reflective coating?	Yes	Fluorescent light	No i do Not adjust the computer's brightness	No	No	No	TRUE	TRUE	TRUE	TRUE	TRUE	TRUE	FALSE	FALSE	No	0	No	0	No	0	No	0	No	0	Yes	6	No	0	No	0	No	0	No	0	No
Male	33-38	East Indian	Tunapuna	Urban	CAPE level	Appropriate	Desktops	Below eye level?	≤ 6 hours	≥ 5 Years	≤ 20 minutes	Yes	Anti reflective coating?	No	Fluorescent light	I adjust computer brightness	No	Yes	No	TRUE	TRUE	TRUE	TRUE	TRUE	TRUE	FALSE	FALSE	No	0	Yes	3	No	0	Yes	4	No	0	Yes	7	No	0	No	0	No	0	No	0	No	Take breaks, Visit optometrist/opthalmologist
Female	28-33	African	Aranguez	Urban	Bachelor’s degree	Appropriate	Desktops	Above eye level?	> 6 hours	≥ 5 Years	>20 minutes	Yes	Anti reflective coating?	Yes	Fluorescent light	I adjust computer brightness	No	Yes	No	TRUE	TRUE	TRUE	TRUE	TRUE	TRUE	FALSE	TRUE	No	0	No	0	No	0	Yes	5	Yes	5	Yes	7	No	0	No	0	No	0	No	0	Yes	Take breaks, Use eye drops, Visit optometrist/opthalmologist, Obtain Specacles
Female	58-63	East Indian	Grand Bazaar	Urban	Master’s degree	Appropriate	Desktops	Above eye level?	≤ 6 hours	≥ 5 Years	>20 minutes	Yes	Anti reflective coating?	No	Fluorescent light	I adjust computer brightness	No	Yes	Yes	FALSE	TRUE	TRUE	TRUE	TRUE	TRUE	FALSE	FALSE	No	0	Yes	5	No	0	No	0	Yes	7	Yes	5	No	0	No	0	No	0	No	0	Yes	Take breaks, Drink water, Use eye drops, Visit optometrist/opthalmologist, Obtain Specacles
Female	23-28	East Indian	San Juan	Urban	Bachelor’s degree	Appropriate	Desktops	Above eye level?	> 6 hours	≥ 5 Years	≤ 20 minutes	No		Yes	Fluorescent light	No i do Not adjust the computer's brightness	Yes	No	No	TRUE	TRUE	TRUE	TRUE	TRUE	TRUE	FALSE	FALSE	Yes	1	Yes	3	No	0	No	0	No	0	Yes	5	No	0	No	0	No	0	No	0	Yes	Take breaks, Other
Female	58-63	East Indian	Aranguez	Agricultural urban	Master’s degree	Appropriate	Desktops	Above eye level?	> 6 hours	≥ 5 Years	>20 minutes	Yes	Anti reflective coating?	Yes	Fluorescent light	No i do Not adjust the computer's brightness	No	Yes	Yes	TRUE	TRUE	TRUE	TRUE	TRUE	TRUE	FALSE	FALSE	No	0	Yes	4	No	0	Yes	5	No	0	Yes	6	No	0	No	0	No	0	No	0	Yes	Take breaks, Use eye drops, Visit optometrist/opthalmologist, Obtain Specacles
Female	23-28	Mixed race , callaloo if you will	Aranguez	Urban	Bachelor’s degree	Appropriate	Desktops	Above eye level?	> 6 hours	≥ 5 Years	≤ 20 minutes	No	Anti reflective coating?	No	Fluorescent light	No i do Not adjust the computer's brightness	No	No	No	TRUE	TRUE	TRUE	TRUE	TRUE	TRUE	FALSE	FALSE	No	0	No	0	No	0	Yes	8	Yes	6	Yes	8	No	0	Yes	5	No	0	No	1	No
Female	33-38	East Indian	Aranguez	Rural	Bachelor’s degree	Appropriate	Desktops	Above eye level?	> 6 hours	≥ 5 Years	None at all	Yes	Anti reflective coating?	No	Fluorescent light	No i do Not adjust the computer's brightness	No	Yes	No	TRUE	TRUE	TRUE	TRUE	TRUE	TRUE	FALSE	FALSE	No	0	No	0	No	0	Yes	4	No	0	Yes	7	No	0	No	0	No	0	No	0	Yes	Use eye drops, Visit optometrist/opthalmologist, Obtain Specacles
Male	38-43	East Indian	Aranguez	Rural	Bachelor’s degree	Appropriate	Desktops	Above eye level?	≤ 6 hours	< 5 Years	≤ 20 minutes	Yes	Anti reflective coating?	No	Fluorescent light	No i do Not adjust the computer's brightness	No	Yes	No	TRUE	TRUE	TRUE	TRUE	TRUE	TRUE	FALSE	FALSE	No	0	No	0	No	0	Yes	3	No	0	Yes	6	No	0	No	0	No	0	No	0	Yes	Obtain Specacles
Male	18-23	East Indian	Aranguez	Urban	Bachelor’s degree	Appropriate	Desktops	Above eye level?	> 6 hours	≥ 5 Years	≤ 20 minutes	Yes	Anti reflective coating?	No	Fluorescent light	I adjust computer brightness	No	Yes	No	TRUE	TRUE	TRUE	TRUE	TRUE	TRUE	FALSE	FALSE	No	0	No	0	No	0	Yes	3	No	0	Yes	6	No	0	No	0	No	0	No	0	Yes	Obtain Specacles
Male	53-58	East Indian	Aranguez	Urban	Bachelor’s degree	Not appropriate	Desktops	At eye level?	> 6 hours	≥ 5 Years	≤ 20 minutes	Yes	Anti reflective coating?	Yes	Natural light	No i do Not adjust the computer's brightness	No	No	No	TRUE	TRUE	TRUE	TRUE	TRUE	TRUE	TRUE	TRUE	Yes	3	No	0	No	0	No	5	No	0	Yes	5	Yes	3	Yes	4	No	0	Yes	1	Yes	Take breaks
Female	28-33	Mixed	Rio Claro	Rural	CSEC level	Not appropriate	Desktops	Above eye level?	≤ 6 hours	≥ 5 Years	≤ 20 minutes	No	Anti reflective coating?	No	Fluorescent light	I adjust computer brightness	No	No	No	TRUE	TRUE	TRUE	TRUE	TRUE	TRUE	FALSE	FALSE	No	0	No	0	No	0	Yes	4	No	0	Yes	6	No	0	No	0	No	0	No	0	No
Female	28-33	Everyone in Trinidad is MIXED	Rio Claro	Rural	CAPE level	Appropriate	Desktops	Above eye level?	> 6 hours	≥ 5 Years	>20 minutes	Yes	Anti reflective coating?	No	Fluorescent light	I adjust computer brightness	No	Yes	No	TRUE	TRUE	TRUE	TRUE	TRUE	TRUE	FALSE	TRUE	No	0	No	0	No	0	Yes	5	Yes	4	Yes	7	No	0	No	0	No	0	No	0	Yes	Use eye drops, Visit optometrist/opthalmologist, Obtain Specacles
Male	28-33	Mixed	Rio Claro	Rural	CAPE level	Appropriate	Desktops	Below eye level?	≤ 6 hours	≥ 5 Years	≤ 20 minutes	No		Yes	Fluorescent light	I adjust computer brightness	Yes	No	No	TRUE	TRUE	TRUE	TRUE	TRUE	TRUE	FALSE	FALSE	No	0	Yes	5	No	0	Yes	3	No	0	Yes	7	Yes	3	No	0	No	0	No	0	No
Female	43-48	East Indian	Rio Claro	Rural	CAPE level	Appropriate	Laptop	At eye level?	≤ 6 hours	≥ 5 Years	≤ 20 minutes	Yes	Anti reflective coating?	No	Fluorescent light	I adjust computer brightness	No	Yes	No	TRUE	TRUE	TRUE	TRUE	TRUE	TRUE	FALSE	FALSE	No	0	No	0	No	0	No	0	No	0	Yes	4	No	0	No	0	No	0	No	0	Yes	Take breaks, Visit optometrist/opthalmologist, Obtain Specacles
Female	38-43	African	Rio Claro	Rural	Bachelor’s degree	Not appropriate	Desktops	Above eye level?	≤ 6 hours	≥ 5 Years	>20 minutes	No		Yes	Fluorescent light	No i do Not adjust the computer's brightness	Yes	No	No	TRUE	TRUE	TRUE	TRUE	TRUE	TRUE	FALSE	FALSE	No	0	No	0	No	0	Yes	4	No	0	No	0	No	0	Yes	3	No	0	No	0	No	Take breaks
Male	28-33	East Indian	Rio Claro	Rural	CAPE level	Appropriate	Desktops	Above eye level?	> 6 hours	≥ 5 Years	≤ 20 minutes	Yes	Anti reflective coating?	No	Fluorescent light	I adjust computer brightness	No	Yes	No	TRUE	TRUE	TRUE	TRUE	TRUE	TRUE	FALSE	FALSE	No	0	Yes	5	No	0	No	0	No	0	Yes	6	No	0	No	0	No	0	No	0	Yes	Visit optometrist/opthalmologist, Obtain Specacles
Female	48-53	African	Rio Claro	Urban	Bachelor’s degree	Appropriate	Desktops	Above eye level?	≤ 6 hours	≥ 5 Years	>20 minutes	Yes	Anti reflective coating?	Yes	Fluorescent light	I adjust computer brightness	No	Yes	No	TRUE	TRUE	TRUE	TRUE	TRUE	TRUE	FALSE	FALSE	No	0	Yes	4	Yes	4	No	0	Yes	5	No	0	Yes	5	Yes	4	No	0	No	0	Yes	Visit optometrist/opthalmologist, Obtain Specacles
Female	33-38	East Indian	San Fernando	Urban	Bachelor’s degree	Not appropriate	Desktops	Above eye level?	≤ 6 hours	≥ 5 Years	≤ 20 minutes	Yes	Anti reflective coating?	No	Fluorescent light	I adjust computer brightness	No	Yes	No	TRUE	TRUE	TRUE	TRUE	TRUE	TRUE	FALSE	FALSE	No	0	Yes	4	Yes	4	No	0	No	0	Yes	5	No	0	No	0	No	0	No	0	Yes	Visit optometrist/opthalmologist, Obtain Specacles
Female	33-38	Mixed	San Fernando	Urban	CSEC level	Not appropriate	Desktops	Below eye level?	> 6 hours	≥ 5 Years	None at all	No		No	Fluorescent light	I adjust computer brightness	No	No	No	TRUE	TRUE	TRUE	TRUE	TRUE	TRUE	FALSE	FALSE	No	0	Yes	7	No	0	Yes	4	No	0	Yes	5	No	0	No	0	No	0	No	0	No
Female	43-48	East Indian	San Fernando	Urban	Bachelor’s degree	Appropriate	Desktops	Above eye level?	≤ 6 hours	≥ 5 Years	≤ 20 minutes	No	Anti reflective coating?	Yes	Fluorescent light	I adjust computer brightness	No	No	No	TRUE	TRUE	TRUE	TRUE	TRUE	TRUE	TRUE	FALSE	No	0	No	0	No	0	No	0	No	0	Yes	6	No	0	No	0	No	0	No	0	Yes	Take breaks
Female	43-48	Mixed race	San Fernando	Urban	CAPE level	Not appropriate	Desktops	Above eye level?	> 6 hours	≥ 5 Years	≤ 20 minutes	Yes	Anti reflective coating?	No	Fluorescent light	I adjust computer brightness	No	No	No	TRUE	TRUE	TRUE	TRUE	TRUE	TRUE	FALSE	FALSE	No	0	No	0	No	0	Yes	4	Yes	7	Yes	5	Yes	5	Yes	6	No	0	No	0	Yes	Take breaks, Use eye drops, Visit optometrist/opthalmologist, Obtain Specacles
Female	33-38	African	Aranguez	Urban	CAPE level	Appropriate	Desktops	Above eye level?	> 6 hours	≥ 5 Years	≤ 20 minutes	No		Yes	Fluorescent light	I adjust computer brightness	No	No	No	TRUE	TRUE	TRUE	TRUE	TRUE	TRUE	FALSE	FALSE	No	0	Yes	2	No	0	No	0	No	0	Yes	4	Yes	2	No	0	No	0	No	0	No
Female	18-23	Mixed	Aranguez	Both	CAPE level	Appropriate	Cellular Phone	At eye level?	≤ 6 hours	< 5 Years	None at all	Yes	Blue light blockers?	Yes	Fluorescent light	I adjust computer brightness	No	No	No	TRUE	TRUE	TRUE	TRUE	TRUE	TRUE	FALSE	FALSE	No	0	No	0	No	0	Yes	3	No	0	Yes	4	No	0	No	0	Yes	4	No	0	No
Female	23-28	Hispanic	Aranguez	Urban	CAPE level	Not appropriate	Desktops	Above eye level?	≤ 6 hours	< 5 Years	≤ 20 minutes	No		Yes	Fluorescent light	No i do Not adjust the computer's brightness	No	No	No	TRUE	TRUE	TRUE	TRUE	TRUE	TRUE	FALSE	FALSE	No	0	No	0	No	0	No	0	No	0	No	0	No	0	No	0	Yes	3	No	0	No
Female	38-43	East Indian	San Fernando	Urban	CAPE level	Appropriate	Desktops	Above eye level?	> 6 hours	≥ 5 Years	None at all	No	Anti reflective coating?	No	Fluorescent light	No i do Not adjust the computer's brightness	No	No	No	TRUE	TRUE	TRUE	TRUE	TRUE	TRUE	FALSE	FALSE	No	0	No	0	No	0	No	0	Yes	6	No	0	No	0	No	0	No	0	No	0	No
Female	33-38	East Indian	San Juan	Urban	Bachelor’s degree	Appropriate	Desktops	Above eye level?	≤ 6 hours	≥ 5 Years	>20 minutes	Yes	Anti reflective coating?	No	Fluorescent light	No i do Not adjust the computer's brightness	No	No	Yes	TRUE	TRUE	TRUE	TRUE	TRUE	TRUE	FALSE	FALSE	No	0	Yes	3	No	0	Yes	5	Yes	6	Yes	5	No	0	No	0	No	0	No	0	Yes	Use eye drops, Visit optometrist/opthalmologist, Obtain Specacles
Male	28-33	African	Aranguez	Urban	Bachelor’s degree	Appropriate	Desktops	Above eye level?	≤ 6 hours	≥ 5 Years	>20 minutes	No		No	Fluorescent light	I adjust computer brightness	No	No	No	TRUE	TRUE	TRUE	TRUE	TRUE	TRUE	FALSE	FALSE	No	0	Yes	3	No	0	No	0	Yes	4	Yes	7	No	0	No	0	No	0	No	0	Yes	Take breaks
Male	48-53	Mixed	Aranguez	Urban	Bachelor’s degree	Appropriate	Desktops	Below eye level?	≤ 6 hours	≥ 5 Years	>20 minutes	Yes	Anti reflective coating?	No	Fluorescent light	No i do Not adjust the computer's brightness	No	Yes	No	TRUE	TRUE	TRUE	TRUE	TRUE	TRUE	FALSE	TRUE	No	0	No	0	No	0	Yes	4	Yes	6	Yes	7	Yes	6	No	0	No	0	No	0	Yes	Take breaks, Use eye drops, Visit optometrist/opthalmologist, Obtain Specacles
Male	28-33	Mixed	San Fernando	Urban	CAPE level	Appropriate	Desktops	Above eye level?	> 6 hours	≥ 5 Years	≤ 20 minutes	No		No	Fluorescent light	I adjust computer brightness	No	No	No	TRUE	TRUE	TRUE	TRUE	TRUE	TRUE	FALSE	FALSE	No	0	Yes	5	No	0	Yes	4	No	0	Yes	6	Yes	5	No	0	No	0	No	0	Yes	Take breaks, Drink water
Female	28-33	African	San Fernando	Urban	Bachelor’s degree	Appropriate	Desktops	Above eye level?	> 6 hours	≥ 5 Years	None at all	Yes	Blue light blockers?	No	Fluorescent light	I adjust computer brightness	Yes	No	No	TRUE	TRUE	TRUE	TRUE	TRUE	TRUE	TRUE	FALSE	No	0	No	0	No	0	Yes	4	No	0	Yes	7	No	0	Yes	6	Yes	5	No	0	Yes	Drink water, Visit optometrist/opthalmologist, Obtain Specacles
Female	33-38	East Indian	San Fernando	Urban	Bachelor’s degree	Appropriate	Laptop	Above eye level?	≤ 6 hours	≥ 5 Years	None at all	No		Yes	Fluorescent light	I adjust computer brightness	No	No	No	TRUE	TRUE	TRUE	TRUE	TRUE	TRUE	FALSE	TRUE	No	0	Yes	5	No	0	No	0	No	0	Yes	7	No	0	No	0	Yes	3	No	0	No
Female	38-43	East Indian	San Fernando	Urban	CSEC level	Not appropriate	Desktops	Above eye level?	> 6 hours	≥ 5 Years	≤ 20 minutes	Yes	Anti reflective coating?	Yes	Fluorescent light	I adjust computer brightness	No	Yes	No	TRUE	TRUE	TRUE	TRUE	TRUE	TRUE	FALSE	FALSE	No	0	Yes	4	No	0	No	0	No	0	Yes	5	No	0	No	0	No	0	No	0	Yes	Use eye drops, Visit optometrist/opthalmologist, Obtain Specacles
Male	28-33	African	San Fernando	Urban	Bachelor’s degree	Appropriate	Desktops	Above eye level?	> 6 hours	≥ 5 Years	≤ 20 minutes	No		No	Fluorescent light	I adjust computer brightness	No	No	No	TRUE	TRUE	TRUE	TRUE	TRUE	TRUE	FALSE	TRUE	Yes	4	No	0	No	0	Yes	6	No	0	Yes	5	No	0	No	0	No	0	No	0	Yes	Take breaks, Drink water
Female	28-33	African	San Fernando	Urban	Bachelor’s degree	Appropriate	Laptop	Below eye level?	≤ 6 hours	≥ 5 Years	≤ 20 minutes	Yes	Anti reflective coating?	No	Fluorescent light	No i do Not adjust the computer's brightness	No	No	No	TRUE	TRUE	TRUE	TRUE	FALSE	TRUE	FALSE	TRUE	No	0	Yes	3	No	0	Yes	3	No	0	Yes	5	No	0	No	0	No	0	No	0	Yes	Visit optometrist/opthalmologist, Obtain Specacles
Female	28-33	Asian	San Fernando	Urban	Bachelor’s degree	Appropriate	Laptop	Above eye level?	≤ 6 hours	≥ 5 Years	>20 minutes	No		No	Fluorescent light	I adjust computer brightness	No	No	Yes	TRUE	TRUE	TRUE	TRUE	TRUE	TRUE	FALSE	FALSE	Yes	3	No	0	No	0	Yes	4	No	0	Yes	5	No	0	No	0	No	0	No	0	Yes	Take breaks, Use eye drops
Female	33-38	Mixed	San Fernando	Urban	CAPE level	Appropriate	Desktops	At eye level?	≤ 6 hours	≥ 5 Years	≤ 20 minutes	Yes	Anti reflective coating?	No	Fluorescent light	No i do Not adjust the computer's brightness	No	Yes	No	TRUE	TRUE	TRUE	TRUE	TRUE	TRUE	FALSE	TRUE	No	0	No	0	Yes	3	No	0	Yes	7	Yes	5	No	0	Yes	4	No	0	No	0	Yes	Take breaks, Use eye drops, Visit optometrist/opthalmologist, Obtain Specacles
Female	23-28	African	San Fernando	Urban	Bachelor’s degree	Appropriate	Desktops	Above eye level?	> 6 hours	≥ 5 Years	≤ 20 minutes	No		No	Fluorescent light	I adjust computer brightness	No	No	No	TRUE	TRUE	TRUE	TRUE	TRUE	TRUE	TRUE	FALSE	No	0	Yes	4	No	0	Yes	3	No	0	Yes	7	No	0	No	0	No	0	No	0	Yes	Take breaks, Drink water, Use eye drops
Female	43-48	African	San Fernando	Urban	CAPE level	Appropriate	Desktops	Above eye level?	> 6 hours	< 5 Years	≤ 20 minutes	Yes	Anti reflective coating?	No	Fluorescent light	I adjust computer brightness	No	Yes	No	TRUE	TRUE	TRUE	TRUE	TRUE	TRUE	FALSE	FALSE	No	0	No	0	No	0	Yes	3	No	0	Yes	8	No	0	No	0	No	0	No	0	Yes	Take breaks, Drink water, Visit optometrist/opthalmologist, Obtain Specacles, Other
Male	38-43	East Indian	San Fernando	Urban	Bachelor’s degree	Appropriate	Desktops	Above eye level?	> 6 hours	≥ 5 Years	>20 minutes	Yes	Anti reflective coating?	Yes	Fluorescent light	No i do Not adjust the computer's brightness	Yes	Yes	No	TRUE	TRUE	TRUE	TRUE	TRUE	TRUE	FALSE	FALSE	No	0	No	0	No	0	Yes	5	Yes	4	Yes	6	No	0	No	0	No	0	No	0	Yes	Visit optometrist/opthalmologist, Obtain Specacles
Female	33-38	East Indian	San Fernando	Urban	CAPE level	Appropriate	Desktops	Above eye level?	≤ 6 hours	≥ 5 Years	≤ 20 minutes	No		Yes	Fluorescent light	No i do Not adjust the computer's brightness	No	No	No	TRUE	TRUE	TRUE	TRUE	TRUE	TRUE	FALSE	TRUE	No	0	Yes	5	No	0	Yes	4	No	0	Yes	6	No	0	No	0	No	0	No	0	No
Female	43-48	East Indian	San Fernando	Urban	CAPE level	Appropriate	Desktops	Above eye level?	> 6 hours	≥ 5 Years	>20 minutes	No		No	Natural light	No i do Not adjust the computer's brightness	No	No	Yes	TRUE	TRUE	TRUE	TRUE	FALSE	TRUE	FALSE	TRUE	No	0	No	0	No	0	No	0	No	0	Yes	6	No	0	No	0	No	0	No	0	No
Male	33-38	Mixed	San Fernando	Urban	Bachelor’s degree	Appropriate	Desktops	Below eye level?	> 6 hours	≥ 5 Years	≤ 20 minutes	No		Yes	Fluorescent light	I adjust computer brightness	No	No	No	TRUE	TRUE	TRUE	TRUE	TRUE	TRUE	FALSE	TRUE	No	0	No	0	No	0	Yes	5	No	0	No	0	No	0	No	0	No	0	No	0	No
Female	48-53	African	San Fernando	Urban	Master’s degree	Appropriate	Desktops	Above eye level?	> 6 hours	≥ 5 Years	None at all	Yes	Anti reflective coating?	No	Fluorescent light	No i do Not adjust the computer's brightness	No	No	Yes	TRUE	TRUE	TRUE	TRUE	TRUE	TRUE	FALSE	TRUE	No	0	Yes	4	No	0	No	0	Yes	6	Yes	5	No	0	Yes	5	No	0	No	0	Yes	Take breaks, Drink water, Use eye drops, Visit optometrist/opthalmologist, Obtain Specacles
Female	28-33	East Indian	San Fernando	Urban	Bachelor’s degree	Appropriate	Laptop	Above eye level?	> 6 hours	≥ 5 Years	>20 minutes	No		Yes	Fluorescent light	I adjust computer brightness	Yes	No	No	TRUE	TRUE	TRUE	TRUE	TRUE	TRUE	FALSE	TRUE	No	0	Yes	5	No	0	Yes	5	No	0	Yes	7	Yes	4	No	0	No	0	No	0	Yes	Take breaks
Male	28-33	East Indian	Aranguez	Urban	CAPE level	Appropriate	Laptop	Above eye level?	> 6 hours	< 5 Years	≤ 20 minutes	Yes	Anti reflective coating?	No	Fluorescent light	I adjust computer brightness	No	Yes	No	TRUE	TRUE	TRUE	TRUE	TRUE	TRUE	FALSE	TRUE	Yes	4	Yes	3	No	0	No	0	Yes	5	Yes	6	No	0	Yes	7	No	0	No	0	Yes	Take breaks, Obtain Specacles
Male	38-43	East Indian	San Fernando	Urban	Bachelor’s degree	Appropriate	Desktops	Above eye level?	> 6 hours	≥ 5 Years	>20 minutes	Yes	Blue light blockers?	Yes	Fluorescent light	No i do Not adjust the computer's brightness	Yes	Yes	No	TRUE	TRUE	TRUE	TRUE	TRUE	TRUE	TRUE	FALSE	No	0	No	0	No	0	Yes	6	No	0	Yes	8	No	0	No	0	No	0	No	0	Yes	Take breaks, Obtain Specacles
Male	28-33	African	San Fernando	Urban	CAPE level	Appropriate	Desktops	Above eye level?	> 6 hours	≥ 5 Years	≤ 20 minutes	No		No	Fluorescent light	No i do Not adjust the computer's brightness	No	No	No	FALSE	TRUE	TRUE	TRUE	TRUE	TRUE	TRUE	FALSE	No	0	No	0	Yes	5	Yes	4	Yes	6	No	0	No	0	No	0	No	0	No	0	No
Female	38-43	East Indian	San Fernando	Urban	Bachelor’s degree	Appropriate	Desktops	Above eye level?	> 6 hours	≥ 5 Years	≤ 20 minutes	No		Yes	Fluorescent light	I adjust computer brightness	No	No	No	TRUE	TRUE	TRUE	TRUE	TRUE	TRUE	FALSE	FALSE	No	0	No	0	No	0	No	0	No	0	Yes	5	No	0	No	0	No	0	No	0	No
Female	33-38	Hispanic	San Fernando	Urban	CAPE level	Appropriate	Desktops	Below eye level?	> 6 hours	≥ 5 Years	≤ 20 minutes	Yes	Blue light blockers?	No	Fluorescent light	No i do Not adjust the computer's brightness	Yes	No	No	TRUE	TRUE	TRUE	TRUE	TRUE	TRUE	FALSE	TRUE	No	0	No	0	No	0	No	0	No	0	Yes	5	No	0	Yes	0	No	0	No	0	Yes	Visit optometrist/opthalmologist, Obtain Specacles
Female	33-38	East Indian	San Fernando	Urban	CAPE level	Appropriate	Desktops	Below eye level?	> 6 hours	≥ 5 Years	≤ 20 minutes	No		No	Fluorescent light	I adjust computer brightness	No	No	No	TRUE	TRUE	TRUE	TRUE	TRUE	TRUE	FALSE	FALSE	No	0	No	0	No	0	No	0	No	0	Yes	5	No	0	No	0	No	0	No	0	No
Male	28-33	East Indian	San Fernando	Urban	CSEC level	Appropriate	Laptop	Above eye level?	≤ 6 hours	≥ 5 Years	>20 minutes	Yes	Anti reflective coating?	No	Fluorescent light	No i do Not adjust the computer's brightness	No	Yes	No	TRUE	TRUE	TRUE	TRUE	TRUE	TRUE	FALSE	TRUE	No	0	No	0	No	0	No	0	Yes	5	No	0	Yes	4	No	0	No	0	No	0	Yes	Visit optometrist/opthalmologist, Obtain Specacles
Male	48-53	African	San Fernando	Urban	Bachelor’s degree	Appropriate	Desktops	At eye level?	> 6 hours	≥ 5 Years	≤ 20 minutes	No	Anti reflective coating?	No	Natural light	I adjust computer brightness	No	Yes	No	TRUE	TRUE	TRUE	TRUE	TRUE	TRUE	FALSE	FALSE	No	0	No	0	No	0	Yes	6	Yes	6	No	0	No	0	No	0	No	0	Yes	3	Yes	Take breaks, Obtain Specacles
Male	28-33	East Indian	San Fernando	Urban	Bachelor’s degree	Not appropriate	Desktops	Above eye level?	≤ 6 hours	≥ 5 Years	None at all	No		No	Fluorescent light	No i do Not adjust the computer's brightness	No	No	No	TRUE	TRUE	TRUE	TRUE	TRUE	TRUE	FALSE	TRUE	No	0	Yes	3	No	0	Yes	5	Yes	7	Yes	7	Yes	5	No	0	No	0	No	0	No
Female	43-48	East Indian	San Fernando	Urban	CAPE level	Appropriate	Desktops	Above eye level?	> 6 hours	≥ 5 Years	≤ 20 minutes	Yes	Blue light blockers?	No	Fluorescent light	No i do Not adjust the computer's brightness	No	No	No	TRUE	TRUE	TRUE	TRUE	TRUE	TRUE	FALSE	FALSE	No	0	No	0	No	0	Yes	5	Yes	4	No	0	No	0	No	0	No	0	No	0	No	Take breaks, Visit optometrist/opthalmologist, Obtain Specacles
Male	23-28	East Indian	San Fernando	Urban	CAPE level	Not appropriate	Laptop	Below eye level?	> 6 hours	< 5 Years	>20 minutes	No		No	Fluorescent light	No i do Not adjust the computer's brightness	No	No	No	TRUE	TRUE	TRUE	TRUE	TRUE	TRUE	TRUE	TRUE	No	0	No	0	No	0	Yes	4	Yes	7	Yes	3	No	0	No	0	No	0	No	0	Yes	Take breaks
Male	43-48	Mixed	San Fernando	Urban	CSEC level	Not appropriate	Desktops	At eye level?	> 6 hours	≥ 5 Years	≤ 20 minutes	No		No	Fluorescent light	I adjust computer brightness	No	No	No	TRUE	TRUE	TRUE	TRUE	TRUE	TRUE	FALSE	FALSE	Yes	5	Yes	5	No	0	No	0	Yes	3	Yes	6	No	0	No	0	No	0	No	0	No
Female	23-28	East Indian	San Fernando	Urban	CSEC level	Appropriate	Desktops	At eye level?	> 6 hours	≥ 5 Years	>20 minutes	Yes	Anti reflective coating?	Yes	Fluorescent light	I adjust computer brightness	No	No	No	TRUE	TRUE	TRUE	TRUE	TRUE	TRUE	FALSE	FALSE	Yes	4	No	0	No	0	Yes	4	Yes	6	Yes	6	Yes	4	No	0	No	0	No	0	No
Female	23-28	African	RBL Marabella	Urban	CSEC level	Not appropriate	Desktops	At eye level?	> 6 hours	< 5 Years	≤ 20 minutes	Yes	Blue light blockers?	Yes	Fluorescent light	I adjust computer brightness	No	Yes	No	TRUE	TRUE	TRUE	TRUE	TRUE	TRUE	FALSE	FALSE	No	0	No	0	Yes	3	No	0	No	0	Yes	5	Yes	4	Yes	6	Yes	3	No	0	Yes	Take breaks, Use eye drops, Visit optometrist/opthalmologist
Female	18-23	African	Marabella	Urban	CAPE level	Appropriate	Desktops	At eye level?	≤ 6 hours	< 5 Years	≤ 20 minutes	No		Yes	Fluorescent light	No i do Not adjust the computer's brightness	No	No	No	TRUE	TRUE	TRUE	TRUE	TRUE	TRUE	FALSE	FALSE	Yes	4	No	0	Yes	2	No	0	No	0	Yes	2	No	0	Yes	2	No	0	No	0	No
Male	38-43	East Indian	Marabella	Urban	Bachelor’s degree	Not appropriate	Desktops	Below eye level?	> 6 hours	≥ 5 Years	≤ 20 minutes	Yes	Anti reflective coating?	No	Fluorescent light	No i do Not adjust the computer's brightness	No	No	No	TRUE	TRUE	TRUE	TRUE	TRUE	TRUE	FALSE	FALSE	Yes	4	No	0	No	0	Yes	6	No	0	Yes	5	Yes	3	Yes	2	No	0	No	0	Yes	Take breaks
Male	28-33	Mixed	Marabella	Urban	CAPE level	Appropriate	Cellular Phone	Above eye level?	≤ 6 hours	< 5 Years	≤ 20 minutes	Yes	Anti reflective coating?	Yes	Fluorescent light	No i do Not adjust the computer's brightness	No	No	No	TRUE	TRUE	TRUE	TRUE	TRUE	TRUE	FALSE	FALSE	Yes	2	Yes	1	No	0	No	0	No	0	Yes	3	Yes	3	Yes	5	Yes	2	Yes	1	No
Female	28-33	East Indian	Marabella	Urban	Bachelor’s degree	Appropriate	Desktops	Above eye level?	> 6 hours	≥ 5 Years	≤ 20 minutes	No		No	Fluorescent light	I adjust computer brightness	Yes	No	No	TRUE	TRUE	TRUE	TRUE	TRUE	TRUE	FALSE	FALSE	No	0	No	0	No	0	Yes	4	No	0	Yes	6	No	0	No	0	No	0	No	0	No
Female	33-38	East Indian	Marabella	Urban	CAPE level	Appropriate	Laptop	Above eye level?	> 6 hours	≥ 5 Years	≤ 20 minutes	No		No	Fluorescent light	I adjust computer brightness	No	No	No	TRUE	TRUE	TRUE	TRUE	TRUE	TRUE	FALSE	FALSE	No	0	No	0	No	0	No	0	No	0	Yes	5	No	0	No	0	No	0	No	0	No
Female	38-43	Syrian	Marabella	Urban	Bachelor’s degree	Appropriate	Desktops	Above eye level?	≤ 6 hours	≥ 5 Years	>20 minutes	Yes	Anti reflective coating?	Yes	Fluorescent light	No i do Not adjust the computer's brightness	No	Yes	No	TRUE	TRUE	TRUE	TRUE	TRUE	TRUE	FALSE	FALSE	No	0	Yes	6	No	0	No	0	Yes	5	Yes	4	No	0	No	0	No	0	No	0	Yes	Visit optometrist/opthalmologist, Obtain Specacles
Male	33-38	East Indian	Marabella	Urban	CAPE level	Appropriate	Desktops	Above eye level?	≤ 6 hours	≥ 5 Years	None at all	Yes	Blue light blockers?	Yes	Fluorescent light	No i do Not adjust the computer's brightness	No	Yes	No	TRUE	TRUE	TRUE	TRUE	TRUE	TRUE	FALSE	FALSE	No	0	No	0	Yes	4	Yes	5	Yes	5	No	0	No	0	No	0	No	0	No	0	Yes	Visit optometrist/opthalmologist, Obtain Specacles
Female	43-48	African	Marabella	Urban	Bachelor’s degree	Appropriate	Desktops	Above eye level?	> 6 hours	< 5 Years	≤ 20 minutes	No		No	Fluorescent light	I adjust computer brightness	No	No	No	TRUE	TRUE	TRUE	TRUE	TRUE	TRUE	TRUE	TRUE	No	0	No	0	No	0	Yes	4	No	0	Yes	5	No	0	No	0	No	0	No	0	Yes	Take breaks, Visit optometrist/opthalmologist, Obtain Specacles
Female	43-48	Mixed	Marabella	Urban	Bachelor’s degree	Appropriate	Desktops	Above eye level?	> 6 hours	≥ 5 Years	>20 minutes	Yes	Anti reflective coating?	No	Fluorescent light	I adjust computer brightness	No	Yes	Yes	TRUE	TRUE	TRUE	TRUE	TRUE	TRUE	FALSE	TRUE	No	0	No	0	No	0	No	0	No	0	Yes	6	No	0	No	0	Yes	5	No	0	No	Drink water, Obtain Specacles
Female	28-33	East Indian	Marabella	Urban	CAPE level	Appropriate	Desktops	Below eye level?	≤ 6 hours	≥ 5 Years	≤ 20 minutes	No		No	Fluorescent light	No i do Not adjust the computer's brightness	Yes	No	No	TRUE	TRUE	TRUE	TRUE	TRUE	TRUE	TRUE	FALSE	No	0	No	0	No	0	No	0	No	0	Yes	4	No	0	No	0	Yes	3	No	0	Yes	Take breaks
Female	28-33	East Indian	Marabella	Urban	CSEC level	Appropriate	Desktops	At eye level?	> 6 hours	≥ 5 Years	None at all	Yes	Anti reflective coating?	No	Fluorescent light	I adjust computer brightness	No	Yes	No	TRUE	TRUE	TRUE	TRUE	TRUE	TRUE	FALSE	FALSE	No	0	Yes	3	No	0	Yes	3	Yes	6	Yes	5	No	0	No	0	No	0	No	0	No	Take breaks, Drink water, Visit optometrist/opthalmologist, Obtain Specacles
Male	38-43	African	Marabella	Urban	CSEC level	Appropriate	Laptop	Below eye level?	> 6 hours	≥ 5 Years	≤ 20 minutes	Yes	Anti reflective coating?	Yes	Fluorescent light	No i do Not adjust the computer's brightness	No	Yes	No	TRUE	TRUE	TRUE	TRUE	TRUE	TRUE	FALSE	FALSE	No	0	Yes	5	No	0	Yes	3	Yes	6	Yes	5	Yes	5	Yes	5	No	0	No	0	Yes	Use eye drops, Visit optometrist/opthalmologist, Obtain Specacles
Female	43-48	African	Port of spain	Urban	CAPE level	Appropriate	Desktops	At eye level?	> 6 hours	≥ 5 Years	≤ 20 minutes	Yes	Anti reflective coating?	Yes	Fluorescent light	No i do Not adjust the computer's brightness	No	Yes	Yes	TRUE	TRUE	TRUE	TRUE	TRUE	TRUE	TRUE	FALSE	No	0	Yes	1	No	0	Yes	1	No	0	No	0	No	0	No	0	No	0	Yes	1	No
Female	33-38	East Indian	San Fernando	Urban	Master’s degree	Appropriate	Desktops	At eye level?	> 6 hours	≥ 5 Years	≤ 20 minutes	Yes	Anti reflective coating?	No	Fluorescent light	I adjust computer brightness	No	Yes	No	TRUE	TRUE	TRUE	TRUE	TRUE	TRUE	FALSE	FALSE	Yes	7	Yes	6	Yes	5	Yes	6	Yes	7	Yes	6	Yes	6	Yes	7	Yes	4	Yes	5	Yes	Take breaks, Drink water, Use eye drops, Visit optometrist/opthalmologist, Obtain Specacles
Female	33-38	African	San Fernando	Urban	Bachelor’s degree	Appropriate	Desktops	At eye level?	> 6 hours	≥ 5 Years	≤ 20 minutes	No		Yes	Natural light	I adjust computer brightness	No	No	No	TRUE	TRUE	TRUE	TRUE	TRUE	TRUE	TRUE	FALSE	Yes	4	No	0	No	0	Yes	7	No	0	Yes	5	No	0	No	0	No	0	No	6	Yes	Take breaks, Drink water
Female	33-38	East Indian	San Fernando	Urban	Bachelor’s degree	Appropriate	Desktops	At eye level?	> 6 hours	≥ 5 Years	≤ 20 minutes	Yes		Yes	Natural light	No i do Not adjust the computer's brightness	No	No	No	TRUE	TRUE	TRUE	TRUE	TRUE	TRUE	TRUE	FALSE	No	0	Yes	5	Yes	6	Yes	8	Yes	8	Yes	8	Yes	8	Yes	8	Yes	6	No	0	Yes	Use eye drops
Female	38-43	East Indian	San Fernando	Urban	CAPE level	Appropriate	Desktops	At eye level?	≤ 6 hours	≥ 5 Years	≤ 20 minutes	Yes	Blue light blockers?	Yes	Natural light	No i do Not adjust the computer's brightness	No	Yes	No	TRUE	TRUE	TRUE	TRUE	TRUE	TRUE	TRUE	FALSE	Yes	5	Yes	5	Yes	5	Yes	5	Yes	5	Yes	5	Yes	5	Yes	6	Yes	5	Yes	5	Yes	Obtain Specacles
Female	28-33	East Indian	San Fernando	Urban	Bachelor’s degree	Appropriate	Desktops	At eye level?	> 6 hours	≥ 5 Years	>20 minutes	Yes	Anti reflective coating?	No	Fluorescent light	I adjust computer brightness	No	Yes	No	TRUE	TRUE	TRUE	TRUE	TRUE	TRUE	FALSE	FALSE	Yes	7	Yes	9	No	0	Yes	5	Yes	7	Yes	7	Yes	6	Yes	6	Yes	5	Yes	5	Yes	Use eye drops, Visit optometrist/opthalmologist, Obtain Specacles
Female	28-33	East Indian	San Fernando	Urban	PhD	Appropriate	Desktops	Below eye level?	≤ 6 hours	≥ 5 Years	None at all	Yes	Anti reflective coating?	No	Natural light	No i do Not adjust the computer's brightness	No	Yes	No	TRUE	TRUE	FALSE	TRUE	TRUE	TRUE	FALSE	FALSE	Yes	5	Yes	2	Yes	10	Yes	4	No	0	No	0	No	0	No	10	Yes	7	No	0	Yes	Take breaks, Drink water, Use eye drops, Visit optometrist/opthalmologist, Obtain Specacles
Female	33-38	East Indian	San Fernando	Urban	CAPE level	Appropriate	Desktops	Above eye level?	≤ 6 hours	≥ 5 Years	None at all	No		Yes	Fluorescent light	I adjust computer brightness	No	No	No	TRUE	TRUE	TRUE	TRUE	TRUE	TRUE	TRUE	FALSE	Yes	4	Yes	4	Yes	4	Yes	2	Yes	3	Yes	3	Yes	3	Yes	3	Yes	3	Yes	3	No
Female	18-23	East Indian	San Fernando	Urban	CSEC level	Appropriate	Desktops	At eye level?	> 6 hours	≥ 5 Years	None at all	Yes	Anti reflective coating?	Yes	Fluorescent light	No i do Not adjust the computer's brightness	Yes	Yes	No	TRUE	TRUE	TRUE	TRUE	TRUE	TRUE	FALSE	FALSE	Yes	10	Yes	10	Yes	10	Yes	10	Yes	10	Yes	10	Yes	10	Yes	10	Yes	10	Yes	10	Yes	Obtain Specacles
Female	38-43	African	San Fernando	Urban	Bachelor’s degree	Appropriate	Desktops	At eye level?	> 6 hours	≥ 5 Years	≤ 20 minutes	No		No	Fluorescent light	No i do Not adjust the computer's brightness	No	No	No	TRUE	TRUE	TRUE	TRUE	TRUE	TRUE	FALSE	TRUE	Yes	2	No	0	No	0	No	0	No	0	No	0	No	0	No	0	No	0	No	0	No
Female	38-43	East Indian	San Fernando	Urban	CSEC level	Appropriate	Desktops	At eye level?	> 6 hours	≥ 5 Years	None at all	Yes	Blue light blockers?	Yes	Fluorescent light	No i do Not adjust the computer's brightness	No	No	No	TRUE	TRUE	TRUE	TRUE	TRUE	TRUE	FALSE	FALSE	No	0	No	0	No	0	No	0	No	0	No	0	No	0	No	0	No	0	No	0	No
Male	18-23	African	San Fernando	Urban	CSEC level	Appropriate	Desktops	At eye level?	> 6 hours	≥ 5 Years	>20 minutes	No		No	Fluorescent light	No i do Not adjust the computer's brightness	No	No	No	TRUE	TRUE	TRUE	TRUE	TRUE	TRUE	TRUE	FALSE	No	0	No	0	No	0	No	0	No	0	No	0	No	0	No	0	No	0	No	0	No
Female	18-23	East Indian	San Fernando	Urban	CSEC level	Appropriate	Desktops	At eye level?	> 6 hours	≥ 5 Years	None at all	No		No	Fluorescent light	No i do Not adjust the computer's brightness	No	No	No	TRUE	TRUE	TRUE	TRUE	TRUE	TRUE	FALSE	FALSE	Yes	7	Yes	9	No	0	Yes	9	No	0	No	0	Yes	4	No	0	Yes	6	No	0	Yes	Visit optometrist/opthalmologist
Female	38-43	Mixed	Chaguanas	Urban	CSEC level	Appropriate	Desktops	Above eye level?	> 6 hours	≥ 5 Years	≤ 20 minutes	Yes	Anti reflective coating?	Yes	Fluorescent light	I adjust computer brightness	No	Yes	No	TRUE	TRUE	TRUE	TRUE	TRUE	TRUE	TRUE	FALSE	Yes	4	Yes	3	No	0	Yes	5	No	0	Yes	5	Yes	3	Yes	3	Yes	3	No	0	Yes	Take breaks, Drink water, Obtain Specacles
Female	48-53	Mixed	San Fernando	Urban	Bachelor’s degree	Appropriate	Desktops	At eye level?	> 6 hours	≥ 5 Years	≤ 20 minutes	Yes	Anti reflective coating?	No	Natural light	I adjust computer brightness	No	No	No	TRUE	TRUE	TRUE	TRUE	TRUE	TRUE	TRUE	TRUE	Yes	6	Yes	6	Yes	4	No	0	No	0	Yes	5	Yes	5	No	0	No	0	Yes	5	Yes	Take breaks, Drink water, Visit optometrist/opthalmologist, Obtain Specacles
Female	33-38	East Indian	Rio Claro	Rural	Master’s degree	Not appropriate	Desktops	Below eye level?	> 6 hours	≥ 5 Years	None at all	Yes	Anti reflective coating?	Yes	Natural light	I adjust computer brightness	Yes	Yes	No	TRUE	TRUE	TRUE	TRUE	TRUE	TRUE	FALSE	FALSE	Yes	7	Yes	5	No	0	Yes	7	No	0	Yes	10	Yes	4	No	0	Yes	6	No	0	No
Female	28-33	East Indian	Rio Claro	Rural	Bachelor’s degree	Appropriate	Desktops	At eye level?	> 6 hours	≥ 5 Years	None at all	Yes	Anti reflective coating?	Yes	Natural light	No i do Not adjust the computer's brightness	Yes	Yes	No	TRUE	TRUE	TRUE	TRUE	TRUE	TRUE	FALSE	FALSE	Yes	10	Yes	10	Yes	10	Yes	10	Yes	10	Yes	10	Yes	10	Yes	10	Yes	10	Yes	10	Yes	Visit optometrist/opthalmologist
Female	28-33	African	Marabella	Urban	CSEC level	Appropriate	Desktops	Above eye level?	> 6 hours	≥ 5 Years	≤ 20 minutes	Yes	Anti reflective coating?	Yes	Fluorescent light	No i do Not adjust the computer's brightness	No	Yes	No	TRUE	TRUE	TRUE	TRUE	TRUE	TRUE	FALSE	FALSE	Yes	6	Yes	10	No	4	Yes	10	No	3	Yes	10	Yes	8	Yes	8	No	4	No	1	Yes	Visit optometrist/opthalmologist, Obtain Specacles
Female	28-33	East Indian	Marabella	Urban	Bachelor’s degree	Not appropriate	Desktops	At eye level?	> 6 hours	≥ 5 Years	≤ 20 minutes	No		Yes	Fluorescent light	No i do Not adjust the computer's brightness	Yes	No	No	TRUE	TRUE	TRUE	TRUE	TRUE	TRUE	TRUE	TRUE	Yes	7	Yes	5	Yes	7	Yes	8	Yes	8	Yes	10	Yes	9	Yes	8	Yes	7	Yes	4	No
Female	23-28	African	Marabella	Urban	CAPE level	Appropriate	Desktops	At eye level?	> 6 hours	< 5 Years	None at all	Yes	Anti reflective coating?	Yes	Natural light	No i do Not adjust the computer's brightness	No	Yes	No	TRUE	TRUE	TRUE	TRUE	TRUE	TRUE	FALSE	FALSE	Yes	7	Yes	7	No	2	Yes	3	Yes	9	Yes	8	Yes	6	Yes	5	No	2	Yes	8	Yes	Use eye drops, Visit optometrist/opthalmologist, Obtain Specacles
Female	23-28	African	Port Of Spain	Urban	Bachelor’s degree	Appropriate	Laptop	At eye level?	> 6 hours	< 5 Years	>20 minutes	No		No	Natural light	No i do Not adjust the computer's brightness	No	No	No	TRUE	TRUE	TRUE	TRUE	TRUE	TRUE	TRUE	TRUE	No	1	Yes	4	No	1	Yes	10	No	1	Yes	10	Yes	4	Yes	8	Yes	8	No	1	No	Take breaks
Female	23-28	Mixed	Port Of Spain	Urban	Bachelor’s degree	Appropriate	Laptop	At eye level?	> 6 hours	≥ 5 Years	>20 minutes	Yes	Anti reflective coating?	No	Natural light	I adjust computer brightness	No	Yes	No	TRUE	TRUE	TRUE	TRUE	TRUE	TRUE	FALSE	FALSE	Yes	5	No	0	No	0	Yes	6	No	1	Yes	2	No	0	No	0	Yes	2	No	0	Yes	Take breaks, Visit optometrist/opthalmologist, Obtain Specacles
Female	33-38	Mixed	Port Of Spain	Rural	CSEC level	Appropriate	Laptop	At eye level?	> 6 hours	≥ 5 Years	≤ 20 minutes	No		Yes	Natural light	No i do Not adjust the computer's brightness	Yes	No	No	TRUE	TRUE	TRUE	TRUE	TRUE	TRUE	FALSE	FALSE	Yes	7	Yes	5	No	0	Yes	9	No	0	No	0	Yes	6	No	0	No	0	No	0	Yes	Take breaks, Visit optometrist/opthalmologist
Female	23-28	African	Port Of Spain	Urban	CSEC level	Appropriate	Desktops	At eye level?	≤ 6 hours	< 5 Years	>20 minutes	No		Yes	Natural light	No i do Not adjust the computer's brightness	Yes	No	No	TRUE	TRUE	TRUE	TRUE	TRUE	TRUE	FALSE	FALSE	Yes	6	Yes	4	No	0	Yes	5	Yes	3	No	0	No	0	Yes	4	No	0	No	0	No
Female	33-38	East Indian	Cunupia	Urban	CAPE level	Appropriate	Desktops	Above eye level?	> 6 hours	≥ 5 Years	≤ 20 minutes	No		Yes	Fluorescent light	I adjust computer brightness	No	No	Yes	TRUE	TRUE	TRUE	TRUE	TRUE	TRUE	FALSE	FALSE	Yes	6	Yes	7	Yes	7	Yes	4	Yes	7	No	0	No	0	No	0	No	0	No	0	Yes	Take breaks, Drink water
Female	23-28	Caucasian	Port Of Spain	Urban	Bachelor’s degree	Appropriate	Desktops	At eye level?	≤ 6 hours	≥ 5 Years	None at all	No		No	Fluorescent light	I adjust computer brightness	No	No	No	TRUE	TRUE	TRUE	TRUE	TRUE	TRUE	FALSE	TRUE	Yes	5	No	0	No	0	Yes	4	Yes	6	No	0	No	0	No	0	Yes	5	No	0	No
Male	28-33	East Indian	Port Of Spain	Urban	Master’s degree	Appropriate	Laptop	At eye level?	> 6 hours	≥ 5 Years	None at all	No		No	Fluorescent light	No i do Not adjust the computer's brightness	No	No	No	TRUE	TRUE	TRUE	TRUE	TRUE	TRUE	FALSE	FALSE	Yes	2	No	0	No	0	Yes	2	No	0	Yes	4	No	0	No	0	No	0	No	0	No
Male	28-33	East Indian	Chaguanas	Urban	Bachelor’s degree	Appropriate	Laptop	At eye level?	> 6 hours	≥ 5 Years	≤ 20 minutes	Yes	Anti reflective coating?	Yes	Fluorescent light	No i do Not adjust the computer's brightness	Yes	Yes	No	TRUE	TRUE	FALSE	TRUE	TRUE	TRUE	FALSE	FALSE	Yes	8	Yes	8	No	0	Yes	8	Yes	8	Yes	10	Yes	6	Yes	6	Yes	5	Yes	3	Yes	Take breaks
Female	23-28	African	Port Of Spain	Urban	CAPE level	Appropriate	Laptop	At eye level?	> 6 hours	≥ 5 Years	≤ 20 minutes	No		Yes	Fluorescent light	No i do Not adjust the computer's brightness	No	No	No	TRUE	TRUE	TRUE	TRUE	TRUE	TRUE	FALSE	TRUE	Yes	2	No	0	No	0	No	0	No	0	No	0	Yes	2	No	0	No	0	No	0	Yes	Take breaks, Drink water
Male	23-28	African	Arranguez	Urban	Bachelor’s degree	Appropriate	Laptop	Above eye level?	> 6 hours	≥ 5 Years	>20 minutes	No		No	Fluorescent light	I adjust computer brightness	No	Yes	No	TRUE	TRUE	TRUE	TRUE	TRUE	TRUE	FALSE	TRUE	No	0	No	0	Yes	8	Yes	7	No	0	Yes	9	Yes	4	No	0	Yes	8	No	0	Yes	Take breaks, Obtain Specacles
Female	48-53	Indian,chinese,spanish	Trincity	Urban	Bachelor’s degree	Appropriate	Laptop	At eye level?	> 6 hours	≥ 5 Years	≤ 20 minutes	Yes	Blue light blockers?	Yes	Fluorescent light	I adjust computer brightness	Yes	Yes	Yes	TRUE	FALSE	TRUE	TRUE	TRUE	TRUE	FALSE	FALSE	Yes	8	Yes	9	Yes	9	No	9	No	9	Yes	9	Yes	9	Yes	9	No	5	Yes	8	Yes	Take breaks, Drink water, Use eye drops, Visit optometrist/opthalmologist, Obtain Specacles
Male	18-23	African	Port Of Spain	Urban	CAPE level	Appropriate	Desktops	At eye level?	> 6 hours	< 5 Years	None at all	No		Yes	Fluorescent light	I adjust computer brightness	No	No	No	TRUE	TRUE	TRUE	TRUE	TRUE	TRUE	FALSE	FALSE	No	0	No	0	No	0	No	0	Yes	3	Yes	4	Yes	1	No	0	No	0	No	0	Yes	Take breaks, Drink water
Female	18-23	Caribbean	Port Of Spain	Urban	CAPE level	Appropriate	Desktops	Above eye level?	≤ 6 hours	< 5 Years	>20 minutes	No		No	Fluorescent light	I adjust computer brightness	No	Yes	No	TRUE	TRUE	TRUE	TRUE	TRUE	TRUE	FALSE	FALSE	No	5	No	3	No	0	Yes	6	No	2	No	4	No	0	No	1	No	0	No	0	Yes	Take breaks, Drink water, Obtain Specacles
Male	18-23	Mixed	Port Of Spain	Urban	CAPE level	Appropriate	Desktops	At eye level?	> 6 hours	< 5 Years	≤ 20 minutes	No		Yes	Fluorescent light	No i do Not adjust the computer's brightness	No	No	No	TRUE	TRUE	TRUE	TRUE	TRUE	TRUE	FALSE	TRUE	Yes	4	No	0	No	0	Yes	5	Yes	4	Yes	4	Yes	6	Yes	6	No	0	No	0	No
Male	28-33	African	Port Of Spain	Urban	Bachelor’s degree	Appropriate	Desktops	At eye level?	> 6 hours	≥ 5 Years	≤ 20 minutes	Yes	Anti reflective coating?	Yes	Fluorescent light	No i do Not adjust the computer's brightness	Yes	Yes	No	TRUE	TRUE	TRUE	TRUE	TRUE	TRUE	FALSE	TRUE	No	0	No	0	No	0	No	0	No	0	Yes	5	No	0	No	0	No	0	No	0	No
Male	23-28	East Indian	Port Of Spain	Urban	CAPE level	Appropriate	Desktops	At eye level?	> 6 hours	≥ 5 Years	≤ 20 minutes	Yes		Yes	Fluorescent light	No i do Not adjust the computer's brightness	Yes	No	No	TRUE	TRUE	TRUE	TRUE	TRUE	TRUE	FALSE	FALSE	Yes	6	Yes	7	No	0	Yes	7	No	0	No	0	No	0	No	0	Yes	7	Yes	7	Yes	Obtain Specacles
Female	18-23	African	Port Of Spain	Urban	CAPE level	Appropriate	Desktops	At eye level?	> 6 hours	≥ 5 Years	None at all	Yes	Anti reflective coating?	Yes	Fluorescent light	I adjust computer brightness	No	Yes	No	TRUE	TRUE	TRUE	TRUE	TRUE	TRUE	FALSE	FALSE	Yes	7	Yes	7	Yes	9	Yes	8	Yes	7	Yes	10	Yes	9	Yes	8	Yes	6	No	0	Yes	Drink water, Use eye drops, Visit optometrist/opthalmologist, Obtain Specacles
Male	18-23	African	Couva	Urban	CSEC level	Appropriate	Desktops	Below eye level?	≤ 6 hours	< 5 Years	≤ 20 minutes	Yes	Blue light blockers?	Yes	Fluorescent light	I adjust computer brightness	Yes	Yes	No	TRUE	TRUE	TRUE	TRUE	TRUE	TRUE	TRUE	FALSE	Yes	5	No	0	No	0	Yes	3	No	0	Yes	8	No	0	No	0	Yes	4	No	0	Yes	Visit optometrist/opthalmologist, Obtain Specacles
Female	18-23	African	Port Of Spain	Urban	CAPE level	Not appropriate	Desktops	At eye level?	> 6 hours	≥ 5 Years	≤ 20 minutes	No		Yes	Fluorescent light	I adjust computer brightness	Yes	No	No	TRUE	TRUE	TRUE	TRUE	TRUE	TRUE	FALSE	FALSE	Yes	5	Yes	4	No	0	No	0	No	0	Yes	4	No	0	Yes	3	Yes	2	Yes	5	No
Female	33-38	African	Port Of Spain	Urban	CAPE level	Not appropriate	Desktops	Below eye level?	≤ 6 hours	≥ 5 Years	≤ 20 minutes	Yes	Anti reflective coating?	Yes	Natural light	No i do Not adjust the computer's brightness	Yes	Yes	No	TRUE	TRUE	TRUE	TRUE	TRUE	TRUE	FALSE	FALSE	Yes	8	Yes	7	Yes	6	Yes	7	Yes	7	Yes	9	Yes	7	Yes	7	Yes	6	Yes	5	Yes	Obtain Specacles
Female	23-28	Mixed	San juan	Urban	Bachelor’s degree	Not appropriate	Desktops	At eye level?	> 6 hours	< 5 Years	None at all	No		No	Fluorescent light	No i do Not adjust the computer's brightness	Yes	No	No	TRUE	TRUE	TRUE	TRUE	TRUE	TRUE	FALSE	FALSE	Yes	4	No	0	Yes	4	Yes	3	Yes	8	Yes	6	Yes	6	No	0	Yes	5	No	0	No
Female	28-33	African	Grand Bazaar	Urban	CSEC level	Appropriate	Desktops	At eye level?	≤ 6 hours	< 5 Years	≤ 20 minutes	Yes	Blue light blockers?	Yes	Fluorescent light	I adjust computer brightness	No	Yes	No	TRUE	TRUE	TRUE	TRUE	TRUE	TRUE	TRUE	TRUE	Yes	6	Yes	8	No	0	Yes	6	No	0	Yes	6	No	0	No	0	No	0	No	0	Yes	Visit optometrist/opthalmologist, Obtain Specacles
Female	28-33	African	Port Of Spain	Urban	Bachelor’s degree	Appropriate	Desktops	Below eye level?	> 6 hours	< 5 Years	None at all	Yes	Anti reflective coating?	No	Fluorescent light	I adjust computer brightness	Yes	No	No	TRUE	TRUE	FALSE	FALSE	FALSE	TRUE	FALSE	FALSE	Yes	10	Yes	10	No	0	Yes	10	Yes	6	Yes	6	Yes	10	Yes	7	Yes	10	Yes	6	No
Male	23-28	Mixed	Diego martin	Urban	CAPE level	Not appropriate	Desktops	Below eye level?	≤ 6 hours	< 5 Years	>20 minutes	Yes	Blue light blockers?	Yes	Fluorescent light	I adjust computer brightness	No	Yes	No	TRUE	TRUE	TRUE	TRUE	TRUE	TRUE	FALSE	FALSE	Yes	5	Yes	2	No	0	Yes	3	No	0	Yes	2	Yes	4	Yes	2	Yes	2	Yes	2	No
Female	18-23	African	Ptown	Urban	Bachelor’s degree	Not appropriate	Desktops	At eye level?	≤ 6 hours	≥ 5 Years	None at all	No		No	Fluorescent light	No i do Not adjust the computer's brightness	Yes	No	No	TRUE	TRUE	TRUE	FALSE	TRUE	TRUE	FALSE	FALSE	No	0	No	0	Yes	4	Yes	3	No	0	Yes	4	Yes	6	No	0	Yes	3	No	0	No
Female	28-33	African	Chaguanas	Rural	Master’s degree	Appropriate	Laptop	Below eye level?	> 6 hours	≥ 5 Years	>20 minutes	Yes	Anti reflective coating?	Yes	Fluorescent light	I adjust computer brightness	No	Yes	No	TRUE	TRUE	TRUE	TRUE	TRUE	FALSE	FALSE	FALSE	Yes	8	Yes	9	No	0	No	0	No	0	Yes	8	No	0	No	0	Yes	5	Yes	8	Yes	Visit optometrist/opthalmologist, Obtain Specacles
Female	28-33	Mixed	Aranguez	Urban	CAPE level	Appropriate	Desktops	Above eye level?	> 6 hours	< 5 Years	>20 minutes	No		No	Fluorescent light	No i do Not adjust the computer's brightness	No	Yes	No	TRUE	TRUE	TRUE	TRUE	TRUE	TRUE	FALSE	TRUE	No	0	No	0	Yes	2	No	0	No	0	Yes	2	Yes	2	Yes	2	No	0	No	0	Yes	Take breaks, Visit optometrist/opthalmologist, Obtain Specacles
Female	23-28	Mixed	St Augustine	Urban	CAPE level	Appropriate	Desktops	At eye level?	≤ 6 hours	≥ 5 Years	>20 minutes	Yes	Anti reflective coating?	No	Fluorescent light	No i do Not adjust the computer's brightness	No	Yes	No	TRUE	TRUE	TRUE	TRUE	TRUE	TRUE	FALSE	FALSE	Yes	7	No	0	Yes	4	Yes	8	No	0	Yes	5	Yes	6	Yes	7	Yes	4	No	0	Yes	Use eye drops, Visit optometrist/opthalmologist, Obtain Specacles
Female	23-28	African	Couva	Rural	Bachelor’s degree	Not appropriate	Desktops	Below eye level?	> 6 hours	≥ 5 Years	≤ 20 minutes	No		Yes	Fluorescent light	No i do Not adjust the computer's brightness	Yes	No	No	TRUE	TRUE	TRUE	TRUE	TRUE	TRUE	FALSE	FALSE	Yes	6	Yes	8	No	0	Yes	10	No	0	Yes	10	No	0	Yes	5	Yes	5	No	0	Yes	Obtain Specacles
Female	18-23	African	Couva	Rural	CSEC level	Appropriate	Desktops	At eye level?	> 6 hours	< 5 Years	>20 minutes	No		No	Fluorescent light	No i do Not adjust the computer's brightness	No	No	No	TRUE	TRUE	TRUE	TRUE	TRUE	TRUE	FALSE	FALSE	Yes	5	No	0	No	0	Yes	10	No	0	Yes	7	Yes	4	No	0	No	0	No	0	No
Female	18-23	Black	Port of spain	Urban	CSEC level	Appropriate	Desktop	At eye level?	> 6 hours	< 5 Years	>20 minutes	No		No	Fluorescent light	No i do Not adjust the computer's brightness	No	No	No	TRUE	TRUE	TRUE	TRUE	TRUE	TRUE	FALSE	FALSE	Yes	5	No	0	No		Yes	10	No		Yes	7	Yes	4	No		No		No		Yes	Take breaks
Male	23-28	African	Chaguanas	Urban	CAPE level	Appropriate	Desktop	At eye level?	> 6 hours	< 5 Years	≤ 20 minutes	Yes	Anti reflective coating?	No	Natural light	I adjust computer brightness	No	No	No	TRUE	TRUE	TRUE	TRUE	TRUE	TRUE	FALSE	FALSE	Yes	4	Yes	3	No	0	No	2	Yes	7	Yes	8	Yes	4	No	3	Yes	2	No	0	Yes	Use eye drops, Visit optometrist/opthalmologist, Obtain Specacles
Female	58-63	Mixed	Port of spain	Urban	Bachelorâ€™s degree	Appropriate	Desktop	Below eye level?	> 6 hours	≥ 5 Years	>20 minutes	Yes	Anti reflective coating?	Yes	Fluorescent light	I adjust computer brightness	Yes	Yes	No	TRUE	TRUE	TRUE	TRUE	FALSE	TRUE	TRUE	FALSE	Yes	6	No	5	Yes	4	No	2	Yes	6	Yes	6	No	4	Yes	5	No	2	No	3	Yes	Use eye drops, Visit optometrist/opthalmologist, Obtain Specacles
Male	48-53	English, Indian and Spanish	Marabella	Sub- Urban	Bachelorâ€™s degree	Appropriate	Desktop	At eye level?	> 6 hours	≥ 5 Years	≤ 20 minutes	Yes	Anti reflective coating?		Fluorescent light	No i do Not adjust the computer's brightness	No	No	No	TRUE	TRUE	TRUE	TRUE	TRUE	TRUE	FALSE	FALSE	No	2	No	0	No	0	No	2	No	0	No	0	No	0	No	0	No	0	No	0	Yes	Visit optometrist/opthalmologist, Obtain Specacles
Female	33-38	East Indian	Chaguanas	Urban	Masterâ€™s degree	Not appropriate	Desktop	Above eye level?	> 6 hours	≥ 5 Years	None at all	No		Yes	Fluorescent light	No i do Not adjust the computer's brightness	Yes	Yes	No	TRUE	TRUE	TRUE	TRUE	TRUE	TRUE	FALSE	FALSE	Yes	9	Yes	9	Yes	9	Yes	9	Yes	9	Yes	9	Yes	0	Yes	0	Yes	7	No	6	No
Female	23-28	African	Couva	rural	Bachelorâ€™s degree	Appropriate	Desktop	At eye level?	> 6 hours	≥ 5 Years	None at all	No		No	Natural light	No i do Not adjust the computer's brightness	No	No	No	TRUE	TRUE	TRUE	TRUE	TRUE	TRUE	TRUE	FALSE	No	0	No	0	No	0	No	0	No	0	Yes	5	No	0	No	0	No	0	No	0	No
Female	28-33	African	Chaguanas	Urban	CSEC level	Appropriate	Laptop	At eye level?	> 6 hours	≥ 5 Years	≤ 20 minutes	No		No	Fluorescent light	No i do Not adjust the computer's brightness	No	No	No	TRUE	TRUE	TRUE	TRUE	TRUE	TRUE	FALSE	FALSE	Yes	5	No		Yes	6	Yes	7	No	0	No	0	No	0	No	0	No	0	No	0	No
Male	23-28	African	Marabella	Sub- Urban	CAPE level	Appropriate	Laptop	Below eye level?	> 6 hours	≥ 5 Years	≤ 20 minutes	No		Yes	Fluorescent light	No i do Not adjust the computer's brightness	No	No	No	TRUE	TRUE	TRUE	TRUE	TRUE	TRUE	FALSE	FALSE	No	0	No	0	No	3	No	2	No	2	No	2	No	2	No	2	No	2	No	0	No
Male	23-28	African	Port of spain	Urban	Bachelorâ€™s degree	Appropriate	Desktop	At eye level?	> 6 hours	≥ 5 Years	>20 minutes	No		Yes	Natural light	I adjust computer brightness	No	No	Yes	TRUE	TRUE	TRUE	TRUE	TRUE	TRUE	FALSE	FALSE	Yes	0	No	0	Yes	4	Yes	7	No	0	Yes	4	Yes	6	No	0	Yes	5	No	0	Yes	Take breaks, Drink water
Female	38-43	Mixed	Marabella	Sub- Urban	Bachelorâ€™s degree	Appropriate	Desktop	At eye level?	> 6 hours	≥ 5 Years	>20 minutes	No		No	Fluorescent light	No i do Not adjust the computer's brightness	Yes	No	No	TRUE	TRUE	TRUE	TRUE	TRUE	TRUE	FALSE	FALSE	Yes	8	Yes	8	No	0	No	0	No	0	Yes	8	Yes	4	Yes	8	Yes	8	No	0	No
Female	38-43	Mixed	Couva	rural	Bachelorâ€™s degree	Appropriate	Desktop	At eye level?	> 6 hours	≥ 5 Years	≤ 20 minutes	Yes	Anti reflective coating?	Yes	Fluorescent light	No i do Not adjust the computer's brightness	No	Yes	No	TRUE	TRUE	TRUE	TRUE	TRUE	TRUE	FALSE	FALSE	No	0	Yes	4	No	0	No	0	No	0	Yes	2	No	0	No	0	No	0	Yes	3	Yes	Obtain Specacles
Female	28-33	African	Chaguanas	Urban	Bachelorâ€™s degree	Not appropriate	Desktop	Above eye level?	≤ 6 Hours	≥ 5 Years	>20 minutes	Yes	Anti reflective coating?	Yes	Fluorescent light	I adjust computer brightness	Yes	No	No	TRUE	TRUE	TRUE	TRUE	TRUE	TRUE	FALSE	TRUE	Yes	7	Yes	4	Yes	3	Yes	9	Yes	6	Yes	6	Yes	7	Yes	5	Yes	2	Yes	4	No
Male	23-28	African	Marabella	Sub- Urban	CAPE level	Appropriate	Desktop	Below eye level?	> 6 hours	≥ 5 Years	None at all	No		No	Natural light	I adjust computer brightness	Yes	No	No	TRUE	TRUE	TRUE	TRUE	TRUE	FALSE	FALSE	TRUE	No		No		Yes	7	Yes	6	Yes	7	Yes	7	Yes	6	Yes	7	Yes	8	No		Yes	Visit optometrist/opthalmologist, Obtain Specacles
Male	23-28	Asian	Chaguanas	Urban	CAPE level	Appropriate	Laptop	Above eye level?	> 6 hours	≥ 5 Years	≤ 20 minutes	Yes	Anti reflective coating?	Yes	Fluorescent light	I adjust computer brightness	Yes	Yes	No	TRUE	TRUE	TRUE	TRUE	TRUE	TRUE	TRUE	FALSE	Yes	8	Yes	5	Yes	5	Yes	7	Yes	8	Yes	7	Yes	7	Yes	7	Yes	7	Yes	6	Yes	Use eye drops, Visit optometrist/opthalmologist, Obtain Specacles
Male	33-38	East Indian	Couva	rural	CAPE level	Appropriate	Laptop	Above eye level?	> 6 hours	≥ 5 Years	None at all	Yes	Anti reflective coating?	Yes	Natural light	I adjust computer brightness	Yes	Yes	Yes	FALSE	TRUE	TRUE	TRUE	TRUE	FALSE	TRUE	TRUE	Yes	7	Yes	8	Yes	4	Yes	4	Yes	8	Yes	6	Yes	7	Yes	3	Yes	8	Yes	8	Yes	Obtain Specacles
Male	23-28	East Indian	Marabella	Sub- Urban	CAPE level	Appropriate	Desktop	Below eye level?	> 6 hours	≥ 5 Years	>20 minutes	No		No	Fluorescent light	I adjust computer brightness	No	No	No	TRUE	TRUE	TRUE	TRUE	TRUE	TRUE	FALSE	FALSE	Yes	4	Yes	0	Yes	7	Yes	0	Yes	4	Yes	6	Yes	6	Yes	5	Yes	3	No		Yes	Take Breaks
Female	43-48	Hispanic	Port of spain	Urban	CAPE level	Appropriate	Laptop	At eye level?	≤ 6 Hours	≥ 5 Years	≤ 20 minutes	Yes	Anti reflective coating?	No	Fluorescent light	No i do Not adjust the computer's brightness	No	Yes	No	FALSE	TRUE	TRUE	TRUE	TRUE	TRUE	FALSE	FALSE	Yes	7	No	0	No	0	Yes	3	No	0	Yes	5	No	0	No	0	No	2	No	0	Yes	Visit optometrist/opthalmologist, Obtain Specacles
Male	23-28	Mixed	Marabella	Sub- Urban	Bachelorâ€™s degree	Appropriate	Laptop	At eye level?	> 6 hours	≥ 5 Years	≤ 20 minutes	Yes	Anti reflective coating?	No	Fluorescent light	I adjust computer brightness	No	No	No	TRUE	TRUE	TRUE	TRUE	TRUE	TRUE	FALSE	FALSE	Yes	7	Yes	7	No	0	Yes	3	Yes	7	Yes	5	Yes	5	Yes	5	Yes	4	No	0	No
Male	23-28	African	Chaguanas	Urban	Bachelorâ€™s degree	Appropriate	Desktop	Below eye level?	> 6 hours	≥ 5 Years	>20 minutes	No		Yes	Natural light	I adjust computer brightness	Yes	No	Yes	TRUE	TRUE	TRUE	TRUE	TRUE	TRUE	FALSE	FALSE	Yes	5	Yes	2	Yes	6	Yes	7	No	0	Yes	6	Yes	4	Yes	2	Yes	5	No	0	Yes	Take breaks, Drink water
Male	43-48	African	Marabella	Sub- Urban	Masterâ€™s degree	Appropriate	Desktop	At eye level?	> 6 hours	≥ 5 Years	≤ 20 minutes	Yes	Blue light blockers?	No	Fluorescent light	No i do Not adjust the computer's brightness	Yes	Yes	Yes	TRUE	TRUE	TRUE	TRUE	TRUE	TRUE	FALSE	FALSE	Yes	3	Yes	3	No	0	No	0	No	0	Yes	4	No	0	No	0	No	0	No	0	Yes	Obtain Specacles
Female	48-53	African	Couva	rural	Masterâ€™s degree	Not appropriate	Desktop	Above eye level?	> 6 hours	≥ 5 Years	≤ 20 minutes	Yes	Anti reflective coating?	No	Fluorescent light	I adjust computer brightness	No	No	No	TRUE	TRUE	TRUE	TRUE	TRUE	TRUE	FALSE	TRUE	No	0	No	0	No	0	No	0	No	0	No	0	No	0	No	0	No	0	No	0	No
Male	38-43	Mixed	Chaguanas	Urban	Bachelorâ€™s degree	Appropriate	Laptop	At eye level?	> 6 hours	≥ 5 Years	None at all	Yes	Anti reflective coating?	Yes	Fluorescent light	No i do Not adjust the computer's brightness	No	Yes	No	TRUE	TRUE	TRUE	TRUE	TRUE	TRUE	FALSE	FALSE	No	0	No	0	No	0	No	0	No	0	Yes	5	No	0	No	0	No	0	No	0	Yes	Visit optometrist/opthalmologist, Obtain Specacles
Female	23-28	East Indian	Port of spain	Urban	Bachelorâ€™s degree	Appropriate	Desktop	Above eye level?	≤ 6 Hours	≥ 5 Years	None at all	No		No	Fluorescent light	I adjust computer brightness	Yes	No	No	TRUE	TRUE	TRUE	TRUE	TRUE	TRUE	TRUE	FALSE	Yes	0	Yes	0	Yes	6	Yes	9	Yes	0	Yes	0	Yes	0	Yes	0	No	0	Yes	6	Yes	Visit optometrist/opthalmologist, Take Breaks
Female	58-63	African	Chaguanas	Urban	Bachelorâ€™s degree	Appropriate	Laptop	At eye level?	> 6 hours	≥ 5 Years	≤ 20 minutes	Yes	Anti reflective coating?	No	Fluorescent light	No i do Not adjust the computer's brightness	No	Yes	No	TRUE	TRUE	TRUE	TRUE	TRUE	TRUE	TRUE	FALSE	Yes	5	No	0	Yes	5	No	0	Yes	8	Yes	3	Yes	5	Yes	4	Yes	3	No	0	Yes	Use eye drops;Visit optometrist/opthalmologist;Obtain Specacles
Female	48-53	African	Marabella	Sub- Urban	Masterâ€™s degree	Not appropriate	Laptop	Above eye level?	> 6 hours	≥ 5 Years	≤ 20 minutes	Yes	Anti reflective coating?	No	Fluorescent light	I adjust computer brightness	No	No	No	TRUE	TRUE	TRUE	TRUE	TRUE	TRUE	FALSE	TRUE	No	0	No	0	No	0	No	0	No	0	No	0	No	0	No	0	No	0	No	0	No
Female	43-48	Mixed	Chaguanas	Urban	Masterâ€™s degree	Not appropriate	Desktop	Below eye level?	≤ 6 Hours	< 5 Years	>20 minutes	Yes	Blue light blockers?	Yes	Fluorescent light	No i do Not adjust the computer's brightness	Yes	Yes	No	TRUE	TRUE	TRUE	TRUE	TRUE	TRUE	FALSE	FALSE	Yes	5	Yes	5	No	0	No	0	Yes	6	No	0	Yes	8	No	0	No	0	No	0	Yes	Obtain Specacles
Female	23-28	Mixed	Chaguanas	Urban	CSEC level	Appropriate	Laptop	At eye level?	≤ 6 Hours	≥ 5 Years	>20 minutes	No		No	Fluorescent light	No i do Not adjust the computer's brightness	No	Yes	No	TRUE	TRUE	TRUE	TRUE	TRUE	TRUE	FALSE	FALSE	No	0	No	0	No	0	Yes	4	No	0	No	0	No	0	No	0	No	0	No	0	No
Female	23-28	African	Port of spain	Urban	Bachelorâ€™s degree	Appropriate	Desktop	At eye level?	> 6 hours	≥ 5 Years	None at all	No		No	Natural light	No i do Not adjust the computer's brightness	No	No	No	TRUE	TRUE	TRUE	TRUE	TRUE	TRUE	TRUE	FALSE	No	0	No	0	No	0	No	0	No	0	Yes	5	No	0	No	0	No	0	No	0	No
Female	23-28	African	Couva	Rural	CSEC level	Appropriate	Desktops	At eye level?	> 6 hours	< 5 Years	>20 minutes	No		No	Fluorescent light	No i do Not adjust the computer's brightness	No	No	No	TRUE	TRUE	TRUE	TRUE	TRUE	TRUE	FALSE	FALSE	Yes	5	No	0	No	0	Yes	0	No	0	Yes	7	Yes	4	No	0	No	0	No	0	No
Female	23-28	East Indian	Marabella	Urban	Bachelorâ€™s degree	Appropriate	Desktops	At eye level?	> 6 hours	≥ 5 Years	>20 minutes	No		No	Fluorescent light	No i do Not adjust the computer's brightness	No	No	No	TRUE	TRUE	TRUE	TRUE	TRUE	TRUE	TRUE	FALSE	Yes	4	No	0	No	0	No	0	Yes	4	Yes	4	No	0	Yes	4	No	0	No	0	No
Female	43-48	Mixed	Marabella	Urban	CSEC level	Appropriate	Desktops	At eye level?	> 6 hours	≥ 5 Years	≤ 20 minutes	Yes	Anti reflective coating?	No	Fluorescent light	No i do Not adjust the computer's brightness	No	Yes	No	TRUE	TRUE	TRUE	TRUE	TRUE	TRUE	FALSE	FALSE	Yes	5	Yes	4	No	0	No	0	Yes	7	Yes	7	No	0	Yes	6	No	0	Yes	5	Yes	Use eye drops;Obtain Specacles
Female	53-58	Mixed	Marabella	Sub urban	Bachelorâ€™s degree	Appropriate	Desktops	At eye level?	≤ 6 Hours	< 5 Years	>20 minutes	Yes	Anti reflective coating?	Yes	Fluorescent light	No i do Not adjust the computer's brightness	No	Yes	Yes	TRUE	TRUE	TRUE	TRUE	TRUE	TRUE	TRUE	FALSE	Yes	6	Yes	7	Yes	7	Yes	8	Yes	7	Yes	7	Yes	7	Yes	7	Yes	5	No	0	Yes	Visit optometrist/opthalmologist;Obtain Specacles
Female	23-28	African	Marabella	Urban	CSEC level	Not appropriate	Desktops	Below eye level?	≤ 6 Hours	≥ 5 Years	≤ 20 minutes	No		Yes	Fluorescent light	No i do Not adjust the computer's brightness	No	No	No	TRUE	TRUE	TRUE	TRUE	TRUE	TRUE	FALSE	FALSE	Yes	4	Yes	2	No	0	Yes	5	Yes	4	Yes	7	Yes	4	Yes	6	Yes	8	No	0	No
Female	23-28	African	Marabella	Urban	CSEC level	Not appropriate	Desktops	Below eye level?	≤ 6 Hours	≥ 5 Years	≤ 20 minutes	No		Yes	Fluorescent light	No i do Not adjust the computer's brightness	No	No	No	TRUE	TRUE	TRUE	TRUE	TRUE	TRUE	FALSE	FALSE	Yes	4	Yes	2	No	0	Yes	5	Yes	4	Yes	7	Yes	4	Yes	6	Yes	8	No	0	No
Male	23-28	African	Marabella	Urban	CSEC level	Appropriate	Desktops	Above eye level?	> 6 hours	≥ 5 Years	≤ 20 minutes	No		No	Natural light	I adjust computer brightness	No	No	No	TRUE	TRUE	TRUE	TRUE	TRUE	TRUE	FALSE	FALSE	No	0	No	0	No	0	No	0	No	0	No	0	No	0	No	0	No	0	No	0	No
Female	33-38	African	Couva	Urban	Bachelorâ€™s degree	Appropriate	Desktops	Below eye level?	> 6 hours	< 5 Years	>20 minutes	Yes		Yes	Fluorescent light	I adjust computer brightness	Yes	No	No	TRUE	TRUE	TRUE	TRUE	TRUE	TRUE	FALSE	FALSE	Yes	6	Yes	7	No	0	Yes	5	No	0	Yes	8	No	0	Yes	6	No	0	No	0	Yes	Visit optometrist/opthalmologist;Obtain Specacles
Female	23-28	African	Couva	Rural	Bachelorâ€™s degree	Appropriate	Desktops	At eye level?	> 6 hours	≥ 5 Years	≤ 20 minutes	Yes	Anti reflective coating?	No	Natural light	No i do Not adjust the computer's brightness	No	No	No	TRUE	TRUE	TRUE	TRUE	TRUE	TRUE	FALSE	FALSE	Yes	7	Yes	5	No	0	No	0	No	0	Yes	5	No	0	Yes	7	Yes	8	No	0	Yes	Visit optometrist/opthalmologist
Female	23-28	African	Couva	Rural	CAPE level	Appropriate	Desktops	Below eye level?	≤ 6 Hours	< 5 Years	>20 minutes	Yes	Anti reflective coating?	No	Fluorescent light	I adjust computer brightness	Yes	No	No	TRUE	TRUE	TRUE	TRUE	TRUE	TRUE	TRUE	FALSE	No	0	No	0	No	0	Yes	3	No	0	No	0	No	0	No	0	No	0	No	0	No
Female	33-38	African	Couva	Urban	Bachelorâ€™s degree	Appropriate	Desktops	Below eye level?	> 6 hours	≥ 5 Years	None at all	Yes		No	Fluorescent light	No i do Not adjust the computer's brightness	No	No	No	TRUE	TRUE	TRUE	TRUE	TRUE	TRUE	FALSE	FALSE	No	0	Yes	8	No	0	Yes	6	Yes	8	Yes	8	No	0	Yes	6	No	0	No	0	Yes	Take breaks;Use eye drops;Visit optometrist/opthalmologist;Obtain Specacles
Female	23-28	Mixed	Marabella	Urban	CSEC level	Appropriate	Desktops	At eye level?	> 6 hours	≥ 5 Years	None at all	Yes	Anti reflective coating?	No	Fluorescent light	No i do Not adjust the computer's brightness	Yes	Yes	No	TRUE	TRUE	TRUE	TRUE	TRUE	TRUE	FALSE	FALSE	Yes	8	Yes	4	Yes	0	Yes	0	Yes	6	Yes	0	Yes	8	Yes	7	Yes	4	Yes	4	No
Female	23-28	East Indian	Marabella	Rural	CAPE level	Not appropriate	Desktops	At eye level?	> 6 hours	≥ 5 Years	≤ 20 minutes	Yes	Anti reflective coating?	Yes	Fluorescent light	No i do Not adjust the computer's brightness	Yes	Yes	No	TRUE	TRUE	FALSE	TRUE	TRUE	TRUE	FALSE	FALSE	Yes	7	Yes	5	Yes	4	Yes	9	Yes	0	Yes	0	Yes	7	Yes	7	No	0	No	0	Yes	Use eye drops;Visit optometrist/opthalmologist;Obtain Specacles
Female	48-53	Mixed	San Fernando	Urban	CSEC level	Appropriate	Desktops	At eye level?	> 6 hours	≥ 5 Years	>20 minutes	Yes	Anti reflective coating?	No	Fluorescent light	No i do Not adjust the computer's brightness	No	No	No	TRUE	TRUE	TRUE	TRUE	TRUE	TRUE	FALSE	FALSE	Yes	7	Yes	7	No	0	No	0	No	0	Yes	6	No	0	No	0	No	0	Yes	5	Yes	Drink water;Visit optometrist/opthalmologist;Obtain Specacles
Female	38-43	African	Marabella	Urban	CSEC level	Appropriate	Desktops	At eye level?	> 6 hours	≥ 5 Years	>20 minutes	Yes	Blue light blockers?	No	Fluorescent light	No i do Not adjust the computer's brightness	No	No	Yes	TRUE	TRUE	TRUE	TRUE	TRUE	TRUE	FALSE	FALSE	Yes	6	Yes	4	No	0	Yes	5	No	0	Yes	5	Yes	6	No	0	No	0	No	0	Yes	Take breaks;Visit optometrist/opthalmologist;Obtain Specacles
Female	53-58	African	San Fernando	Urban	CSEC level	Appropriate	Desktops	At eye level?	> 6 hours	< 5 Years	>20 minutes	Yes	Anti reflective coating?	No	Fluorescent light	No i do Not adjust the computer's brightness	No	Yes	No	TRUE	TRUE	TRUE	TRUE	TRUE	TRUE	FALSE	FALSE	Yes	4	Yes	3	No	0	Yes	3	No	0	Yes	4	No	0	Yes	3	No	0	No	0	Yes	Take breaks;Drink water;Visit optometrist/opthalmologist;Obtain Specacles
Female	48-53	African	San Fernando	Urban	CSEC level	Not appropriate	Desktops	Below eye level?	≤ 6 Hours	< 5 Years	>20 minutes	No		Yes	Fluorescent light	No i do Not adjust the computer's brightness	Yes	No	No	TRUE	TRUE	TRUE	TRUE	TRUE	TRUE	FALSE	TRUE	Yes	5	Yes	5	No	0	Yes	3	No	0	Yes	8	No	0	No	0	No	0	Yes	2	Yes	Take breaks
Female	53-58	East Indian	San Fernando	Urban	CSEC level	Appropriate	Desktops	At eye level?	> 6 hours	≥ 5 Years	≤ 20 minutes	Yes	Anti reflective coating?	Yes	Natural light	No i do Not adjust the computer's brightness	Yes	Yes	Yes	TRUE	TRUE	TRUE	TRUE	TRUE	TRUE	TRUE	FALSE	Yes	8	Yes	8	Yes	5	Yes	3	Yes	3	Yes	7	Yes	5	Yes	6	Yes	5	Yes	5	Yes	Take breaks;Drink water;Use eye drops;Obtain Specacles
Female	23-28	Mixed	Marabella	Urban	CAPE level	Appropriate	Desktops	At eye level?	> 6 hours	≥ 5 Years	≤ 20 minutes	No		Yes	Fluorescent light	I adjust computer brightness	No	No	No	TRUE	TRUE	TRUE	TRUE	TRUE	TRUE	FALSE	FALSE	No	0	No	0	No	0	No	0	No	0	No	0	No	0	No	0	No	0	No	0	No
Female	43-48	African	Marabella	Urban	CSEC level	Appropriate	Desktops	At eye level?	> 6 hours	≥ 5 Years	≤ 20 minutes	Yes	Blue light blockers?	Yes	Fluorescent light	I adjust computer brightness	No	No	No	TRUE	TRUE	TRUE	TRUE	TRUE	TRUE	FALSE	FALSE	Yes	7	Yes	7	Yes	7	Yes	7	Yes	7	Yes	7	Yes	7	Yes	7	No	0	No	0	Yes	Take breaks;Use eye drops;Visit optometrist/opthalmologist;Obtain Specacles
[truncated: 2 more columns]
